# Supplementary material for: Transcriptome and Metabolome Analyses Reveal That Jasmonic Acids May Facilitate the Infection of Cucumber Green Mottle Mosaic Virus in Bottle Gourd
Source: MDPI journal article supplement (doi:10.3390/ijms242316566), 2023-11-21
Supplement: s1 [file s1]

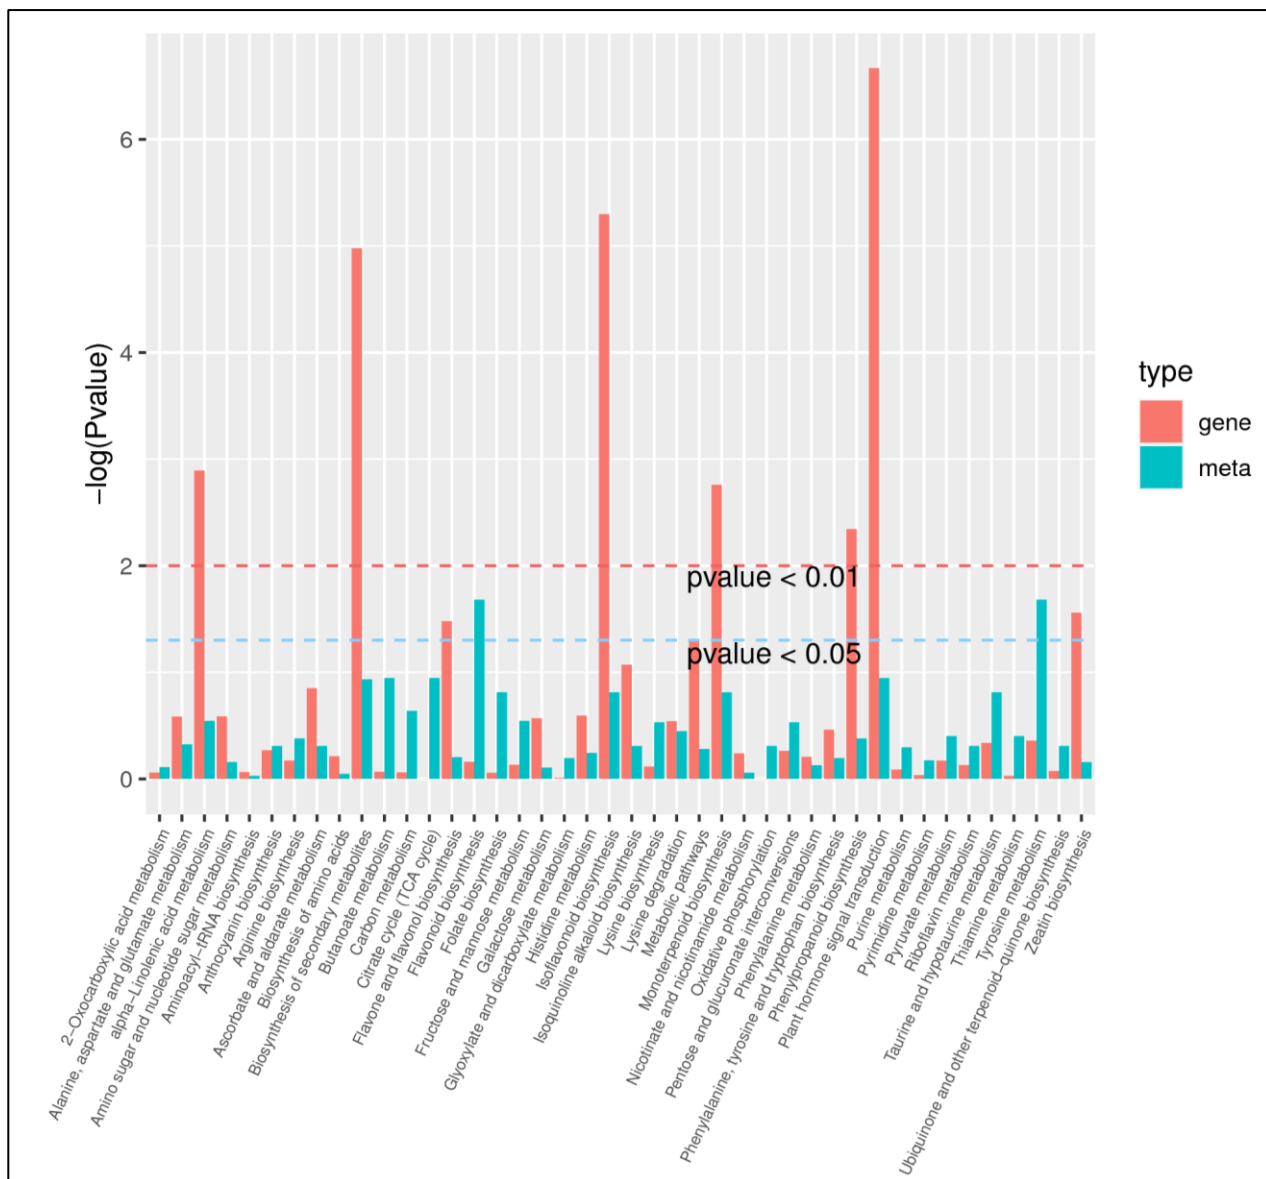

## Supplementary Figure 2 KEGG enrichment analysis of transcriptome and metabolome.

The horizontal axis of the bar graph represents metabolic pathways, while the vertical axis in red represents the enrichment  $p$  value of differential genes and the green represents the enrichment  $p$  value of differential metabolites.
