# Supplementary material for: Transcriptome and Metabolome Analyses Reveal That Jasmonic Acids May Facilitate the Infection of Cucumber Green Mottle Mosaic Virus in Bottle Gourd
Source: Int J Mol Sci. 2023 Nov 21;24(23):16566. doi: 10.3390/ijms242316566 (PMC10706418; doi:10.3390/ijms242316566)
Supplement: Supplementary file 1 [file ijms-24-16566-s001.zip]

Archive with 5 entries (5 files):
- Supplementary Figure S1.pdf
- Supplementary Figure S2.pdf
- Table S1.docx
- Table S2.xlsx
- Table S3.xlsx
