# Supplementary material for: Transcriptome and Metabolome Analyses Reveal That Jasmonic Acids May Facilitate the Infection of Cucumber Green Mottle Mosaic Virus in Bottle Gourd
Source: Int J Mol Sci. 2023 Nov 21;24(23):16566. doi: 10.3390/ijms242316566 (PMC10706418; doi:10.3390/ijms242316566)
Supplement: Supplementary file 1 [file ijms-24-16566-s001.zip › Table S2.xlsx]

## Sheet: Sheet1
Table S2 DAMs revealed by metabolism analysis between ZLM12 and ZLV12
Index	Formula	Compounds	Class I	Class II	CAS	Level	VIP	Fold_Change	Log2FC	Type
pmp000545	C16H18O9	4-Caffeoylquinic acid*	Phenolic acids	Phenolic acids	905-99-7	B	1.41403	13804.1	13.7528	up
Hmln002149	C29H36O15	Acteoside	Phenolic acids	Phenolic acids	61276-17-3	B	1.40809	5390.78	12.3963	up
pme1786	C29H35O17+	Malvidin-3,5-O-diglucoside (Malvin)	Flavonoids	Anthocyanins	-	B	1.27097	75.4729	6.23789	up
Zmhn001926	C13H16O8	Salicylic acid O-glycoside*	Phenolic acids	Phenolic acids	-	A	1.40451	46.5828	5.54172	up
Zmxn001997	C13H16O8	Isosalicylic acid O-glycoside*	Phenolic acids	Phenolic acids	-	A	1.29306	18.7607	4.22964	up
Hmcn001884	C21H20O12	6-Hydroxyluteolin 5-glucoside*	Flavonoids	Flavonoid	-	A	1.36049	14.1068	3.81832	up
pme0309	C8H8O5	Methyl gallate	Tannins	Tannin	99-24-1	B	1.37606	8.05049	3.00908	up
pme1654	C12H18O3	Jasmonic acid	Organic acids	Organic acids	77026-92-7	B	1.34298	5.25571	2.39389	up
pmp000571	C15H10O5	Apigenin	Flavonoids	Flavonoid	520-36-5	A	1.36024	5.25256	2.39302	up
pmb2871	C13H16O9	2,5-Dihydroxy benzoic acid O-hexside	Phenolic acids	Phenolic acids	-	A	1.05561	4.58945	2.19832	up
pmp001068	C32H40O17	6''-O-p-Coumaroylgenipin gentiobioside	Terpenoids	Monoterpenoids	-	B	1.28058	4.56236	2.18978	up
mws0180	C7H6O4	2,5-Dihydroxybenzoic acid	Phenolic acids	Phenolic acids	490-79-9	A	1.32742	4.4723	2.16102	up
pme0088	C15H10O6	Luteolin	Flavonoids	Flavonoid	491-70-3	A	1.36594	4.46163	2.15757	up
pmf0359	C15H16O8	Skimmin	Lignans and Coumarins	Coumarins	93-39-0	A	1.37839	4.0559	2.02002	up
Hmcn000773	C21H32O14	6'-O-glucosylaucubin	Others	Others	-	B	1.34537	4.04066	2.01459	up
HJAP023	C33H40O21	Kaempferol-C-glucoside-C-glucoside-O-glucoside	Flavonoids	Flavonoid	-	B	1.34185	3.92189	1.97155	up
pmn001668	C21H20O9	Apigenin-3-O-rhamnoside	Flavonoids	Flavonoid	-	A	1.39262	3.86137	1.94911	up
pmb0382	C19H14O6	O-Feruloyl 4-hydroxylcoumarin	Lignans and Coumarins	Coumarins	-	A	1.20055	3.75887	1.9103	up
mws0064	C15H12O6	Eriodictyol	Flavonoids	Dihydroflavone	552-58-9	A	1.38187	3.67678	1.87844	up
HJAP025	C27H30O16	Kaempferol-C-glucoside-O-glucoside	Flavonoids	Flavonoid	-	B	1.27033	3.5599	1.83184	up
mad2400	C23H20O11	p-Coumaroylferuloyltartaric acid	Phenolic acids	Phenolic acids	-	B	1.2995	3.542	1.82456	up
pme3968	C6H7N5O	7-Methylguanine	Nucleotides and derivatives	Nucleotides and derivatives	578-76-7	A	1.07439	3.47167	1.79563	up
pme1976	C4H4N2	Pyrimidine	Nucleotides and derivatives	Nucleotides and derivatives	289-95-2	B	1.40239	3.44228	1.78336	up
pme1002	C8H11NO	L-Tyramine	Amino acids and derivatives	Amino acids and derivatives	51-67-2	A	1.20955	3.43229	1.77917	up
pmb0680	C36H36O17	C-Hexosyl-apigenin O-p-coumaroylhexoside	Flavonoids	Flavonoid carbonoside	-	B	1.32175	3.42239	1.775	up
Lmyp003837	C33H40O19	Isovitexin-7-O-Glucoside-2''-O-Rhamnoside	Flavonoids	Flavonoid carbonoside	-	B	1.33424	3.4024	1.76655	up
Rfmb319	C6H11NO2	Pipecolic acid	Amino acids and derivatives	Amino acids and derivatives	4043-87-2	B	1.39486	3.39201	1.76214	up
pmb3012	C22H22O11	Chrysoeriol-7-O-glucoside	Flavonoids	Flavonoid	-	A	1.28877	3.37206	1.75363	up
pmb0545	C23H25O11+	Rosinidin O-hexoside	Flavonoids	Anthocyanins	-	B	1.26929	3.35921	1.74812	up
cub062	C36H56O12	23,24-Dihydro cucurbitacin D O-glucoside	Terpenoids	Triterpene Saponin	-	B	1.23069	3.26942	1.70904	up
pmb2991	C33H40O19	Apigenin O-hexosyl-O-rutinoside	Flavonoids	Flavonoid	-	B	1.38812	3.21406	1.6844	up
mws1179	C21H22O10	Naringenin-7-O-glucoside	Flavonoids	Dihydroflavone	529-55-5	A	1.35496	3.20433	1.68002	up
pme2074	C18H29NO4	N-[(-)-Jasmonoyl]-(L)-Isoleucine (JA-L-Ile)	Organic acids	Organic acids	120330-93-0	B	1.34849	3.20012	1.67813	up
mws0146	C7H7NO2	Nicotinic Acid Methyl Ester(Methyl Nicotinate)	Alkaloids	Alkaloids	93-60-7	B	1.32421	3.06965	1.61807	up
Zmhp003322	C36H36O17	Isovitexin 2''-O-(6'''-(E)-p-coumaroyl)glucoside	Flavonoids	Flavonoid	-	B	1.2525	3.05219	1.60985	up
mws0058	C16H12O6	Diosmetin*	Flavonoids	Flavonoid	520-34-3	A	1.38982	2.9921	1.58116	up
pmn001705	C30H48O4	3,24-Dihydroxy-17,21-semiacetal-12(13)oleanolic fruit	Terpenoids	Triterpene	-	B	1.17602	2.98622	1.57832	up
pmb0764	C6H9NOS	4-Methyl-5-thiazoleethanol	Others	Others	137-00-8	B	1.19813	2.84806	1.50998	up
pmb0037	C10H15NO	Hordenine	Alkaloids	Alkaloids	539-15-1	B	1.26175	2.8437	1.50777	up
Hmbp000904	C7H6O	Benzaldehyde	Others	Others	100-52-7	A	1.37106	2.83899	1.50538	up
pmb0803	C24H29NO11	Pyridoxine O-feruloyl hexoside	Others	Vitamin	-	B	1.39334	2.7765	1.47327	up
mws0749	C7H6O3	4-Hydroxybenzoic acid	Phenolic acids	Phenolic acids	99-96-7	A	1.27868	2.74949	1.45916	up
pme2380	C5H6O5	A-Ketoglutaric acid	Organic acids	Organic acids	328-50-7	B	1.26658	2.74719	1.45796	up
pme0264	C10H14N2O5	Thymidine	Nucleotides and derivatives	Nucleotides and derivatives	50-89-5	A	1.22924	2.6523	1.40724	up
Lmyp004052	C30H26O14	Quercetin 3-O-(6''-trans-p-Coumaroyl)-β-D-galactopyranoside	Flavonoids	Flavonoid	-	B	1.27968	2.45717	1.297	up
pme0040	C5H5N5	Adenine	Nucleotides and derivatives	Nucleotides and derivatives	73-24-5	A	1.28345	2.33051	1.22065	up
Hmln002189	C24H22O15	Quercetin-3-O-(6''-O-malonyl)-galactoside	Flavonoids	Flavonols	-	B	1.36258	2.32106	1.21478	up
mws0213	C5H12O5	Ribitol*	Others	Saccharides and Alcohols	488-81-3	B	1.36039	2.30321	1.20364	up
mws0154	C7H10O5	Shikimic acid	Organic acids	Organic acids	138-59-0	B	1.19703	2.25201	1.17122	up
pme2237	C6H14O6	Dulcitol	Others	Saccharides and Alcohols	608-66-2	B	1.3514	2.24873	1.16911	up
pma0134	C4H8O4	D(-)-Threose	Others	Saccharides and Alcohols	95-43-2	B	1.13982	2.24826	1.16881	up
pmb0636	C26H28O15	6-C-Hexosyl luteolin O-pentoside*	Flavonoids	Flavonoid carbonoside	-	A	1.29915	2.23045	1.15733	up
pmd0146	C28H54NO7P	LysoPC 20:2(2n isomer)	Lipids	LPC	-	B	1.27454	2.16859	1.11676	up
mws1610	C30H48O4	Maslinic acid	Terpenoids	Triterpene	4373-41-5	B	1.09534	2.15747	1.10934	up
Lmtp002942	C25H26O13	Apigenin-6,8-di-C-α-L-arabinopyranoside	Flavonoids	Flavonoid carbonoside	-	B	1.39718	2.14661	1.10206	up
mws0251	C5H6N2O2	Thymine	Nucleotides and derivatives	Nucleotides and derivatives	65-71-4	B	1.23864	2.14276	1.09947	up
pmb0678	C37H38O18	8-C-Hexosyl-apigenin O-feruloylhexoside	Flavonoids	Flavonoid carbonoside	-	A	1.34716	2.1288	1.09004	up
pmp000120	C22H22O11	Diosmetin-6-C-glucoside	Flavonoids	Flavonoid	-	A	1.40952	2.10291	1.07238	up
pmb0550	C21H21O11+	Cyanidin-3-O-glucoside (Kuromanin)	Flavonoids	Anthocyanins	47705-70-4	B	1.27265	2.0958	1.0675	up
mws0921	C9H10O2	p-Coumaryl alcohol	Phenolic acids	Phenolic acids	3690-05-9	B	1.34025	2.09373	1.06607	up
pmp000233	C22H22O11	Swertiajaponin	Flavonoids	Flavonoid carbonoside	6980-25-2	A	1.3902	2.07505	1.05314	up
pmn001691	C18H32O5	9,12,13-Trihyroxy-10,15-octadecadienoic acid	Lipids	Free fatty acids	-	A	1.16021	2.05167	1.0368	up
pme2960	C15H12O5	Naringenin chalcone*	Flavonoids	Chalcones	73692-50-9	A	1.41111	2.0505	1.03597	up
pmb2976	C33H40O20	Chrysoeriol-C-pentosyl-O-hexosyl-O-hexoside	Flavonoids	Flavonoid	-	B	1.30287	2.03567	1.02551	up
pmb1912	C20H23N7O7	10-Formyl-THF	Alkaloids	Alkaloids	2800-34-2	A	1.38046	2.03472	1.02483	up
Hmln002199	C23H22O13	Quercetin-3-O-(6''-O-acetyl)-galactoside	Flavonoids	Flavonols	-	B	1.39404	2.03281	1.02348	up
Rfmb25702	C28H34O12	Pinoresinol-acetylglucose	Lignans and Coumarins	Lignans	-	B	1.15403	2.01591	1.01143	up
pme0033	C5H4N4O	Hypoxanthine	Nucleotides and derivatives	Nucleotides and derivatives	68-94-0	B	1.3166	2.00359	1.00258	up
Lmhn003799	C24H22O12	feruloylferuloyltartaric acid	Phenolic acids	Phenolic acids	-	B	1.31417	2.00078	1.00057	up
mws1574	C16H22O10	Geniposidic acid	Terpenoids	Sesquiterpenoids	27741-01-1	B	1.19352	0.499482	-1.0015	down
mws1346	C6H11NO4	DL-2-Aminoadipic acid	Alkaloids	Alkaloids	542-32-5	B	1.3296	0.480284	-1.05804	down
mws0376	C4H4O4	Fumaric acid	Organic acids	Organic acids	110-17-8	B	1.20978	0.469273	-1.0915	down
pme2435	C6H12O5	L-Fucose	Others	Saccharides and Alcohols	2438-80-4	B	1.36772	0.464358	-1.10669	down
pme2993	C10H8O4	Scopoletin(7-Hydroxy-5-methoxycoumarin)	Lignans and Coumarins	Coumarins	92-61-5	B	1.05164	0.439718	-1.18535	down
mws0884	C10H12N5O6P	Cyclic AMP	Nucleotides and derivatives	Nucleotides and derivatives	60-92-4	A	1.17492	0.434119	-1.20384	down
pmb3081	C6H11PO11	Glucarate O-Phosphoric acid	Others	Saccharides and Alcohols	-	A	1.1094	0.433129	-1.20713	down
