# Supplementary material for: Transcriptome and Metabolome Analyses Reveal That Jasmonic Acids May Facilitate the Infection of Cucumber Green Mottle Mosaic Virus in Bottle Gourd
Source: Int J Mol Sci. 2023 Nov 21;24(23):16566. doi: 10.3390/ijms242316566 (PMC10706418; doi:10.3390/ijms242316566)
Supplement: Supplementary file 1 [file ijms-24-16566-s001.zip › Table S3.xlsx]

## Sheet: Sheet1
Table S3 Transcriptome analysis of TFs in response to CGMMV in bottle gourd
ID	Family	Category	Classification	ZLM12	ZLV 12	log2FoldChange	regulated	chr	strand	KEGG	GO	Pfam
Lsi08G002460	AP2/ERF-ERF	TF	AP2/ERF->AP2/ERF-ERF	1	1876	11.483	up	chr08	+	K09286 EREBP-like factor | (RefSeq) ethylene-responsive transcription factor RAP2-6 isoform X1 (A)	GO:0005634,nucleus; GO:0003677,DNA binding; GO:0003700,DNA-binding transcription factor activity; GO:0009873,ethylene-activated signaling pathway; GO:0045893,positive regulation of transcription, DNA-templated; GO:0048510,regulation of timing of transition from vegetative to reproductive phase; GO:0006351,transcription, DNA-templated	AP2 domain
Lsi02G024900	WRKY	TF	WRKY	0	147	9.638	up	chr02	+	K12835 ATP-dependent RNA helicase DDX42 [EC:3.6.4.13] | (RefSeq) DEAD-box ATP-dependent RNA helicase 24 isoform X1 (A)	GO:0005634,nucleus; GO:0003700,DNA-binding transcription factor activity; GO:1990837,sequence-specific double-stranded DNA binding; GO:0045893,positive regulation of transcription, DNA-templated; GO:0006351,transcription, DNA-templated; GO:0010228,vegetative to reproductive phase transition of meristem	WRKY DNA -binding domain
Lsi03G019280	AP2/ERF-ERF	TF	AP2/ERF->AP2/ERF-ERF	0	61	8.368	up	chr03	+	K09286 EREBP-like factor | (RefSeq) dehydration-responsive element-binding protein 1F-like (A)	GO:0005634,nucleus; GO:0003677,DNA binding; GO:0003700,DNA-binding transcription factor activity; GO:0009631,cold acclimation; GO:0045893,positive regulation of transcription, DNA-templated; GO:0009409,response to cold; GO:0006351,transcription, DNA-templated	AP2 domain
Lsi08G005640	AP2/ERF-ERF	TF	AP2/ERF->AP2/ERF-ERF	1	351	8.077	up	chr08	+	K09286 EREBP-like factor | (RefSeq) LOW QUALITY PROTEIN: ethylene-responsive transcription factor RAP2-6 (A)	GO:0005634,nucleus; GO:0003677,DNA binding; GO:0003700,DNA-binding transcription factor activity; GO:0009873,ethylene-activated signaling pathway; GO:0045893,positive regulation of transcription, DNA-templated; GO:0048510,regulation of timing of transition from vegetative to reproductive phase; GO:0006351,transcription, DNA-templated	AP2 domain
Lsi09G016300	SBP	TF	SBP	0	32	7.439	up	chr09	+	K13415 protein brassinosteroid insensitive 1 [EC:2.7.10.1 2.7.11.1] | (RefSeq) uncharacterized protein LOC103413440 isoform X1 (A)	GO:0005737,cytoplasm; GO:0005634,nucleus; GO:0003677,DNA binding; GO:0046872,metal ion binding; GO:0048653,anther development; GO:0030154,cell differentiation; GO:0009554,megasporogenesis; GO:0009556,microsporogenesis; GO:0006355,regulation of transcription, DNA-templated; GO:0006351,transcription, DNA-templated	SBP domain
Lsi05G003630	B3	TF	B3->B3	3	502	7.386	up	chr05	+	--	GO:0005634,nucleus; GO:0003677,DNA binding; GO:0006355,regulation of transcription, DNA-templated; GO:0006351,transcription, DNA-templated	B3 DNA binding domain
Lsi08G012340	AP2/ERF-ERF	TF	AP2/ERF->AP2/ERF-ERF	0	12	6.09	up	chr08	+	K09286 EREBP-like factor | (RefSeq) ethylene-responsive transcription factor RAP2-13-like (A)	GO:0005634,nucleus; GO:0003677,DNA binding; GO:0003700,DNA-binding transcription factor activity; GO:0009873,ethylene-activated signaling pathway; GO:0006351,transcription, DNA-templated	AP2 domain
Lsi06G008160	AP2/ERF-ERF	TF	AP2/ERF->AP2/ERF-ERF	4	265	5.943	up	chr06	-	K09286 EREBP-like factor | (RefSeq) ethylene-responsive transcription factor TINY-like (A)	GO:0005634,nucleus; GO:0003700,DNA-binding transcription factor activity; GO:0043565,sequence-specific DNA binding; GO:0009873,ethylene-activated signaling pathway; GO:0045893,positive regulation of transcription, DNA-templated; GO:0006351,transcription, DNA-templated	AP2 domain
Lsi07G011090	bHLH	TF	bHLH	25	1154	5.526	up	chr07	-	K13422 transcription factor MYC2 | (RefSeq) transcription factor MYC3 (A)	GO:0005634,nucleus; GO:0043425,bHLH transcription factor binding; GO:0003677,DNA binding; GO:0003700,DNA-binding transcription factor activity; GO:0046983,protein dimerization activity; GO:0009718,anthocyanin-containing compound biosynthetic process; GO:0006952,defense response; GO:0045893,positive regulation of transcription, DNA-templated; GO:0006355,regulation of transcription, DNA-templated; …	Hepatic lectin, N-terminal domain
Lsi02G026750	AP2/ERF-ERF	TF	AP2/ERF->AP2/ERF-ERF	2	106	5.362	up	chr02	+	K09286 EREBP-like factor | (RefSeq) ethylene-responsive transcription factor RAP2-4-like (A)	GO:0005634,nucleus; GO:0003677,DNA binding; GO:0003700,DNA-binding transcription factor activity; GO:0009873,ethylene-activated signaling pathway; GO:0006351,transcription, DNA-templated	AP2 domain
Lsi02G001830	MYB	TF	MYB->MYB	39	1146	4.86	up	chr02	+	K09422 transcription factor MYB, plant | (RefSeq) transcription factor MYB108-like (A)	GO:0005634,nucleus; GO:0003700,DNA-binding transcription factor activity; GO:0000981,DNA-binding transcription factor activity, RNA polymerase II-specific; GO:0043565,sequence-specific DNA binding; GO:0001135,RNA polymerase II transcription regulator recruiting activity; GO:0044212,transcription regulatory region DNA binding; GO:0030154,cell differentiation; GO:0016036,cellular response to phosph…	Myb-like DNA-binding domain
Lsi02G028040	HB-other	TF	HB->HB-other	363	9993	4.779	up	chr02	-	K09338 homeobox-leucine zipper protein | (RefSeq) homeobox-leucine zipper protein GLABRA 2 (A)	GO:0005634,nucleus; GO:0008289,lipid binding; GO:0043565,sequence-specific DNA binding; GO:0006355,regulation of transcription, DNA-templated; GO:0006351,transcription, DNA-templated	--
Lsi01G011130	AP2/ERF-ERF	TF	AP2/ERF->AP2/ERF-ERF	22	571	4.736	up	chr01	-	K09286 EREBP-like factor | (RefSeq) ethylene-responsive transcription factor RAP2-6 isoform X1 (A)	GO:0005634,nucleus; GO:0003677,DNA binding; GO:0003700,DNA-binding transcription factor activity; GO:0009873,ethylene-activated signaling pathway; GO:0045893,positive regulation of transcription, DNA-templated; GO:0048510,regulation of timing of transition from vegetative to reproductive phase; GO:0006351,transcription, DNA-templated	AP2 domain
Lsi03G022200	Trihelix	TF	Trihelix	16	413	4.732	up	chr03	+	--	GO:0016592,mediator complex; GO:0005730,nucleolus; GO:0005634,nucleus; GO:0003700,DNA-binding transcription factor activity; GO:0000981,DNA-binding transcription factor activity, RNA polymerase II-specific; GO:0043565,sequence-specific DNA binding; GO:0006355,regulation of transcription, DNA-templated; GO:0006351,transcription, DNA-templated	Myb/SANT-like DNA-binding domain
Lsi09G012390	AP2/ERF-ERF	TF	AP2/ERF->AP2/ERF-ERF	41	1009	4.601	up	chr09	-	K14516 ethylene-responsive transcription factor 1 | (RefSeq) ethylene-responsive transcription factor 1B-like (A)	GO:0005634,nucleus; GO:0003677,DNA binding; GO:0003700,DNA-binding transcription factor activity; GO:0006952,defense response; GO:0009873,ethylene-activated signaling pathway; GO:0009867,jasmonic acid mediated signaling pathway; GO:0006351,transcription, DNA-templated	AP2 domain
Lsi04G004640	HB-HD-ZIP	TF	HB->HB-HD-ZIP	3	63	4.41	up	chr04	+	K09338 homeobox-leucine zipper protein | (RefSeq) homeobox-leucine zipper protein ATHB-54 (A)	GO:0005634,nucleus; GO:0003700,DNA-binding transcription factor activity; GO:0042803,protein homodimerization activity; GO:0043565,sequence-specific DNA binding; GO:0009965,leaf morphogenesis; GO:0045893,positive regulation of transcription, DNA-templated; GO:0009637,response to blue light; GO:0009651,response to salt stress; GO:0006351,transcription, DNA-templated	Homeobox KN domain
Lsi06G015850	MYB	TF	MYB->MYB	14	287	4.406	up	chr06	+	K09422 transcription factor MYB, plant | (RefSeq) transcription factor MYB32-like (A)	GO:0005634,nucleus; GO:0000981,DNA-binding transcription factor activity, RNA polymerase II-specific; GO:0043565,sequence-specific DNA binding; GO:0001135,RNA polymerase II transcription regulator recruiting activity; GO:0044212,transcription regulatory region DNA binding; GO:0030154,cell differentiation; GO:0006357,regulation of transcription by RNA polymerase II; GO:0006351,transcription, DNA-t…	Myb-like DNA-binding domain
Lsi02G028200	AP2/ERF-ERF	TF	AP2/ERF->AP2/ERF-ERF	6	103	4.199	up	chr02	+	K09286 EREBP-like factor | (RefSeq) dehydration-responsive element-binding protein 3-like (A)	GO:0005634,nucleus; GO:0003700,DNA-binding transcription factor activity; GO:0043565,sequence-specific DNA binding; GO:0009873,ethylene-activated signaling pathway; GO:0045893,positive regulation of transcription, DNA-templated; GO:0006351,transcription, DNA-templated	AP2 domain
Lsi06G013250	MYB-related	TF	MYB->MYB-related	1	11	4.106	up	chr06	-	K09422 transcription factor MYB, plant | (RefSeq) transcription factor MYB24-like (A)	GO:0005634,nucleus; GO:0003700,DNA-binding transcription factor activity; GO:0000981,DNA-binding transcription factor activity, RNA polymerase II-specific; GO:0043565,sequence-specific DNA binding; GO:0001135,RNA polymerase II transcription regulator recruiting activity; GO:0044212,transcription regulatory region DNA binding; GO:0030154,cell differentiation; GO:0016036,cellular response to phosph…	Herpesvirus transcription activation factor (transactivator)
Lsi04G020860	C2H2	TF	C2H2	1	23	4.095	up	chr04	+	--	GO:0005634,nucleus; GO:0003700,DNA-binding transcription factor activity; GO:0046872,metal ion binding; GO:0003676,nucleic acid binding; GO:0009738,abscisic acid-activated signaling pathway; GO:0009788,negative regulation of abscisic acid-activated signaling pathway; GO:0009640,photomorphogenesis	C2H2-type zinc finger
Lsi07G005200	AP2/ERF-ERF	TF	AP2/ERF->AP2/ERF-ERF	1	11	4.029	up	chr07	-	K09286 EREBP-like factor | (RefSeq) ethylene-responsive transcription factor TINY (A)	GO:0005634,nucleus; GO:0003677,DNA binding; GO:0003700,DNA-binding transcription factor activity; GO:0006351,transcription, DNA-templated	AP2 domain
Lsi02G008940	Others	TR	Others	61	997	4.021	up	chr02	-	--	--	Divergent CCT motif
Lsi08G010270	bHLH	TF	bHLH	12	200	4.02	up	chr08	+	K22484 transcriptional regulator CBF1 | (RefSeq) transcription factor bHLH106-like (A)	GO:0005634,nucleus; GO:0003677,DNA binding; GO:0003700,DNA-binding transcription factor activity; GO:0046983,protein dimerization activity; GO:0006355,regulation of transcription, DNA-templated; GO:0006351,transcription, DNA-templated	Helix-loop-helix DNA-binding domain
Lsi06G009920	AUX/IAA	TR	AUX/IAA	93	1393	3.899	up	chr06	-	K14484 auxin-responsive protein IAA | (RefSeq) auxin-responsive protein IAA29-like (A)	GO:0005634,nucleus; GO:0009734,auxin-activated signaling pathway; GO:0006355,regulation of transcription, DNA-templated; GO:0006351,transcription, DNA-templated	AUX/IAA family
Lsi02G001430	C2C2-Dof	TF	C2C2->C2C2-Dof	69	961	3.81	up	chr02	-	K20043 clathrin coat assembly protein AP180 | (RefSeq) putative clathrin assembly protein At5g35200 (A)	GO:0005634,nucleus; GO:0003677,DNA binding; GO:0046872,metal ion binding; GO:0006355,regulation of transcription, DNA-templated; GO:0006351,transcription, DNA-templated	Dof domain, zinc finger
Lsi02G007740	AP2/ERF-ERF	TF	AP2/ERF->AP2/ERF-ERF	2	23	3.708	up	chr02	+	K09286 EREBP-like factor | (RefSeq) ethylene-responsive transcription factor 4-like (A)	GO:0005634,nucleus; GO:0003677,DNA binding; GO:0003700,DNA-binding transcription factor activity; GO:0006952,defense response; GO:0009873,ethylene-activated signaling pathway; GO:0006351,transcription, DNA-templated	AP2 domain
Lsi08G003040	AP2/ERF-ERF	TF	AP2/ERF->AP2/ERF-ERF	3	40	3.702	up	chr08	+	K13434 pathogenesis-related genes transcriptional activator PTI6 | (RefSeq) ethylene-responsive transcription factor CRF6-like (A)	GO:0005737,cytoplasm; GO:0005634,nucleus; GO:0003700,DNA-binding transcription factor activity; GO:0043565,sequence-specific DNA binding; GO:0048825,cotyledon development; GO:0009736,cytokinin-activated signaling pathway; GO:0009793,embryo development ending in seed dormancy; GO:0009873,ethylene-activated signaling pathway; GO:0048366,leaf development; GO:0006351,transcription, DNA-templated	AP2 domain
Lsi07G005190	C2C2-GATA	TF	C2C2->C2C2-GATA	12	146	3.689	up	chr07	+	K17895 GATA-binding protein 3 | (RefSeq) GATA transcription factor 9 (A)	GO:0005634,nucleus; GO:0005667,transcription factor complex; GO:0003682,chromatin binding; GO:0003700,DNA-binding transcription factor activity; GO:0000977,RNA polymerase II regulatory region sequence-specific DNA binding; GO:0001085,RNA polymerase II transcription factor binding; GO:0001228,DNA-binding transcription activator activity, RNA polymerase II-specific; GO:0008270,zinc ion binding; GO:…	GATA zinc finger
Lsi07G008060	Others	TR	Others	1	8	3.648	up	chr07	-	--	--	Divergent CCT motif
LsiUNG001440	MYB-related	TF	MYB->MYB-related	196	2371	3.595	up	chr00	-	K09422 transcription factor MYB, plant | (RefSeq) transcription repressor MYB6-like (A)	GO:0005634,nucleus; GO:0003700,DNA-binding transcription factor activity; GO:0000981,DNA-binding transcription factor activity, RNA polymerase II-specific; GO:0043565,sequence-specific DNA binding; GO:0001135,RNA polymerase II transcription regulator recruiting activity; GO:0044212,transcription regulatory region DNA binding; GO:0030154,cell differentiation; GO:0010468,regulation of gene expressi…	Myb-like DNA-binding domain
Lsi10G000290	GNAT	TR	GNAT	21	236	3.491	up	chr10	-	K22883 L-ornithine N5-acetyltransferase [EC:2.3.1.-] | (RefSeq) probable acetyltransferase NATA1-like isoform X1 (A)	GO:0009507,chloroplast; GO:0008080,N-acetyltransferase activity; GO:0006952,defense response; GO:0006591,ornithine metabolic process; GO:0009753,response to jasmonic acid	--
Lsi05G000690	AP2/ERF-ERF	TF	AP2/ERF->AP2/ERF-ERF	24	253	3.396	up	chr05	+	K13434 pathogenesis-related genes transcriptional activator PTI6 | (RefSeq) pathogenesis-related genes transcriptional activator PTI6-like (A)	GO:0005737,cytoplasm; GO:0005634,nucleus; GO:0003677,DNA binding; GO:0003700,DNA-binding transcription factor activity; GO:0009736,cytokinin-activated signaling pathway; GO:0009873,ethylene-activated signaling pathway; GO:0048366,leaf development; GO:0006351,transcription, DNA-templated	AP2 domain
Lsi02G004050	MYB	TF	MYB->MYB	6	60	3.392	up	chr02	+	K09422 transcription factor MYB, plant | (RefSeq) transcription factor MYB86-like (A)	GO:0005634,nucleus; GO:0000981,DNA-binding transcription factor activity, RNA polymerase II-specific; GO:0043565,sequence-specific DNA binding; GO:0001135,RNA polymerase II transcription regulator recruiting activity; GO:0044212,transcription regulatory region DNA binding; GO:0030154,cell differentiation; GO:0006357,regulation of transcription by RNA polymerase II; GO:0006351,transcription, DNA-t…	Myb-like DNA-binding domain
Lsi05G010160	MYB-related	TF	MYB->MYB-related	19	194	3.383	up	chr05	+	K09422 transcription factor MYB, plant | (RefSeq) transcription factor MYB4-like (A)	GO:0005634,nucleus; GO:0003700,DNA-binding transcription factor activity; GO:0000981,DNA-binding transcription factor activity, RNA polymerase II-specific; GO:0043565,sequence-specific DNA binding; GO:0001135,RNA polymerase II transcription regulator recruiting activity; GO:0044212,transcription regulatory region DNA binding; GO:0030154,cell differentiation; GO:0045893,positive regulation of tran…	SLIDE
Lsi04G018340	NAC	TF	NAC	1	16	3.379	up	chr04	-	K00521 ferric-chelate reductase [EC:1.16.1.7] | (RefSeq) ferric reduction oxidase 7, chloroplastic-like (A)	GO:0005634,nucleus; GO:0003677,DNA binding; GO:0003700,DNA-binding transcription factor activity; GO:0010014,meristem initiation; GO:0007275,multicellular organism development; GO:0010199,organ boundary specification between lateral organs and the meristem; GO:0006351,transcription, DNA-templated	--
Lsi02G010990	MADS-M-type	TF	MADS->MADS-M-type	1	13	3.352	up	chr02	-	K12412 pheromone receptor transcription factor | (RefSeq) agamous-like MADS-box protein AGL62 (A)	GO:0005634,nucleus; GO:0003700,DNA-binding transcription factor activity; GO:0046983,protein dimerization activity; GO:0000977,RNA polymerase II regulatory region sequence-specific DNA binding; GO:0009960,endosperm development; GO:0045944,positive regulation of transcription by RNA polymerase II; GO:2000012,regulation of auxin polar transport; GO:0006351,transcription, DNA-templated	SRF-type transcription factor (DNA-binding and dimerisation domain)
Lsi06G014830	WRKY	TF	WRKY	4	42	3.328	up	chr06	-	K01892 histidyl-tRNA synthetase [EC:6.1.1.21] | (RefSeq) WRKY family transcription factor (A)	GO:0005634,nucleus; GO:0003700,DNA-binding transcription factor activity; GO:0043565,sequence-specific DNA binding; GO:0006952,defense response; GO:0006351,transcription, DNA-templated	Ezrin/radixin/moesin family
Lsi06G012090	bHLH	TF	bHLH	218	2159	3.311	up	chr06	-	K18486 heart-and neural crest derivatives-expressed protein 2 | (RefSeq) transcription factor bHLH27-like (A)	GO:0005634,nucleus; GO:0003677,DNA binding; GO:0046983,protein dimerization activity; GO:0006355,regulation of transcription, DNA-templated; GO:0006351,transcription, DNA-templated	--
Lsi08G010860	AP2/ERF-ERF	TF	AP2/ERF->AP2/ERF-ERF	66	653	3.291	up	chr08	-	K09286 EREBP-like factor | (RefSeq) dehydration-responsive element-binding protein 3-like (A)	GO:0005634,nucleus; GO:0003700,DNA-binding transcription factor activity; GO:0043565,sequence-specific DNA binding; GO:0009873,ethylene-activated signaling pathway; GO:0045893,positive regulation of transcription, DNA-templated; GO:0006351,transcription, DNA-templated	AP2 domain
Lsi11G002620	OFP	TF	OFP	1	13	3.286	up	chr11	+	K01870 isoleucyl-tRNA synthetase [EC:6.1.1.5] | (RefSeq) hypothetical protein (A)	GO:0005634,nucleus; GO:0045892,negative regulation of transcription, DNA-templated; GO:0006351,transcription, DNA-templated	Transcriptional repressor, ovate
Lsi02G008050	C2C2-Dof	TF	C2C2->C2C2-Dof	5	49	3.248	up	chr02	-	K16222 Dof zinc finger protein DOF5.5 | (RefSeq) cyclic dof factor 1 isoform X1 (A)	GO:0005634,nucleus; GO:0003700,DNA-binding transcription factor activity; GO:0046872,metal ion binding; GO:0044212,transcription regulatory region DNA binding; GO:0006355,regulation of transcription, DNA-templated; GO:0010214,seed coat development; GO:0006351,transcription, DNA-templated	Dof domain, zinc finger
Lsi02G005130	SBP	TF	SBP	13	122	3.241	up	chr02	-	K13415 protein brassinosteroid insensitive 1 [EC:2.7.10.1 2.7.11.1] | (RefSeq) uncharacterized protein LOC103413440 isoform X1 (A)	GO:0005634,nucleus; GO:0003677,DNA binding; GO:0046872,metal ion binding; GO:0048653,anther development; GO:0006355,regulation of transcription, DNA-templated; GO:0006351,transcription, DNA-templated	--
Lsi07G005480	bHLH	TF	bHLH	12	116	3.217	up	chr07	-	K10863 aprataxin [EC:3.1.11.7 3.1.11.8 3.1.12.2] | (RefSeq) basic helix-loop-helix family protein (A)	GO:0005634,nucleus; GO:0003677,DNA binding; GO:0003700,DNA-binding transcription factor activity; GO:0046983,protein dimerization activity; GO:0006355,regulation of transcription, DNA-templated; GO:0006351,transcription, DNA-templated	Helix-loop-helix DNA-binding domain
Lsi06G013330	LOB	TF	LOB	29	248	3.131	up	chr06	+	K13945 LOB domain-containing protein 29 | (RefSeq) LOB domain-containing protein 14 (A)	GO:0006355,regulation of transcription, DNA-templated	Lateral organ boundaries (LOB) domain
Lsi10G010600	MYB	TF	MYB->MYB	4	37	3.082	up	chr10	+	K09422 transcription factor MYB, plant | (RefSeq) transcription factor MYB82-like (A)	GO:0005634,nucleus; GO:0003700,DNA-binding transcription factor activity; GO:0000981,DNA-binding transcription factor activity, RNA polymerase II-specific; GO:0043565,sequence-specific DNA binding; GO:0001135,RNA polymerase II transcription regulator recruiting activity; GO:0044212,transcription regulatory region DNA binding; GO:0030154,cell differentiation; GO:0050832,defense response to fungus;…	Myb-like DNA-binding domain
Lsi03G010920	AP2/ERF-ERF	TF	AP2/ERF->AP2/ERF-ERF	46	387	3.065	up	chr03	+	K09286 EREBP-like factor | (RefSeq) ethylene-responsive transcription factor ERF071 isoform X1 (A)	GO:0005737,cytoplasm; GO:0005634,nucleus; GO:0005886,plasma membrane; GO:0003677,DNA binding; GO:0003700,DNA-binding transcription factor activity; GO:0043565,sequence-specific DNA binding; GO:0008219,cell death; GO:0009873,ethylene-activated signaling pathway; GO:0010286,heat acclimation; GO:0045893,positive regulation of transcription, DNA-templated; GO:0009735,response to cytokinin; GO:0009723…	AP2 domain
Lsi03G019510	Trihelix	TF	Trihelix	3	27	3.038	up	chr03	-	--	GO:0005634,nucleus; GO:0010629,negative regulation of gene expression; GO:1900037,regulation of cellular response to hypoxia	Myb/SANT-like DNA-binding domain
Lsi11G015040	MYB	TF	MYB->MYB	33	258	2.972	up	chr11	+	K09422 transcription factor MYB, plant | (RefSeq) myb-related protein Myb4-like (A)	GO:0005634,nucleus; GO:0000981,DNA-binding transcription factor activity, RNA polymerase II-specific; GO:0043565,sequence-specific DNA binding; GO:0001135,RNA polymerase II transcription regulator recruiting activity; GO:0044212,transcription regulatory region DNA binding; GO:0030154,cell differentiation; GO:0045893,positive regulation of transcription, DNA-templated; GO:0006357,regulation of tra…	Family of unknown function (DUF5643)
Lsi02G028840	Tify	TF	Tify	2172	16530	2.929	up	chr02	-	K13464 jasmonate ZIM domain-containing protein | (RefSeq) protein TIFY 10B-like (A)	GO:0005634,nucleus; GO:0003714,transcription corepressor activity; GO:0006952,defense response; GO:1903507,negative regulation of nucleic acid-templated transcription; GO:0031347,regulation of defense response; GO:2000022,regulation of jasmonic acid mediated signaling pathway; GO:0006355,regulation of transcription, DNA-templated; GO:0009611,response to wounding; GO:0006351,transcription, DNA-tem…	tify domain
Lsi06G009070	AUX/IAA	TR	AUX/IAA	293	2218	2.921	up	chr06	+	K14484 auxin-responsive protein IAA | (RefSeq) auxin-responsive protein IAA16-like (A)	GO:0005634,nucleus; GO:0009734,auxin-activated signaling pathway; GO:0006355,regulation of transcription, DNA-templated; GO:0009733,response to auxin; GO:0006351,transcription, DNA-templated	AUX/IAA family
Lsi01G015500	Trihelix	TF	Trihelix	2	15	2.917	up	chr01	+	--	GO:0005634,nucleus; GO:0003700,DNA-binding transcription factor activity; GO:0042802,identical protein binding; GO:0000981,DNA-binding transcription factor activity, RNA polymerase II-specific; GO:0043565,sequence-specific DNA binding; GO:0006355,regulation of transcription, DNA-templated; GO:0006351,transcription, DNA-templated	Myb-like DNA-binding domain
Lsi10G013050	C2C2-Dof	TF	C2C2->C2C2-Dof	33	240	2.897	up	chr10	-	K20043 clathrin coat assembly protein AP180 | (RefSeq) putative clathrin assembly protein At5g35200 (A)	GO:0005634,nucleus; GO:0003700,DNA-binding transcription factor activity; GO:0046872,metal ion binding; GO:0044212,transcription regulatory region DNA binding; GO:0006355,regulation of transcription, DNA-templated; GO:0048364,root development; GO:0006351,transcription, DNA-templated	Dof domain, zinc finger
Lsi04G003810	bHLH	TF	bHLH	220	1622	2.884	up	chr04	-	--	GO:0003677,DNA binding; GO:0046983,protein dimerization activity; GO:0006357,regulation of transcription by RNA polymerase II	CENP-Q, a CENPA-CAD centromere complex subunit
Lsi03G018490	OFP	TF	OFP	18	128	2.855	up	chr03	+	K01870 isoleucyl-tRNA synthetase [EC:6.1.1.5] | (RefSeq) hypothetical protein (A)	GO:0005634,nucleus; GO:0045892,negative regulation of transcription, DNA-templated; GO:0006351,transcription, DNA-templated	Transcriptional repressor, ovate
Lsi04G003700	C2H2	TF	C2H2	8	57	2.843	up	chr04	+	--	GO:0005634,nucleus; GO:0003700,DNA-binding transcription factor activity; GO:0046872,metal ion binding; GO:0044212,transcription regulatory region DNA binding; GO:0006355,regulation of transcription, DNA-templated; GO:0006351,transcription, DNA-templated	Zinc finger, C2H2 type
Lsi02G005440	PLATZ	TF	PLATZ	7	52	2.838	up	chr02	-	K04733 interleukin-1 receptor-associated kinase 4 [EC:2.7.11.1] | (RefSeq) probable L-type lectin-domain containing receptor kinase S.5 (A)	--	--
Lsi11G002400	AP2/ERF-ERF	TF	AP2/ERF->AP2/ERF-ERF	272	1906	2.809	up	chr11	-	K09286 EREBP-like factor | (RefSeq) dehydration-responsive element-binding protein 3-like (A)	GO:0005634,nucleus; GO:0003700,DNA-binding transcription factor activity; GO:0043565,sequence-specific DNA binding; GO:0009873,ethylene-activated signaling pathway; GO:0045893,positive regulation of transcription, DNA-templated; GO:0006351,transcription, DNA-templated	AP2 domain
Lsi09G007950	Others	TR	Others	56	389	2.802	up	chr09	+	K14492 two-component response regulator ARR-A family | (RefSeq) two-component response regulator ORR10-like (A)	GO:0005622,intracellular; GO:0009736,cytokinin-activated signaling pathway; GO:0000160,phosphorelay signal transduction system; GO:0006355,regulation of transcription, DNA-templated; GO:0006351,transcription, DNA-templated	Response regulator receiver domain
Lsi01G008730	bZIP	TF	bZIP	23	152	2.751	up	chr01	-	K09060 plant G-box-binding factor | (RefSeq) bZIP transcription factor 68-like (A)	GO:0005634,nucleus; GO:0003677,DNA binding; GO:0003700,DNA-binding transcription factor activity; GO:0046982,protein heterodimerization activity; GO:0006351,transcription, DNA-templated	Basic region leucine zipper
Lsi08G005290	C2C2-Dof	TF	C2C2->C2C2-Dof	13	87	2.737	up	chr08	-	K20043 clathrin coat assembly protein AP180 | (RefSeq) putative clathrin assembly protein At5g35200 (A)	GO:0005634,nucleus; GO:0003677,DNA binding; GO:0003700,DNA-binding transcription factor activity; GO:0046872,metal ion binding; GO:0006355,regulation of transcription, DNA-templated; GO:0006351,transcription, DNA-templated	Dof domain, zinc finger
Lsi02G010150	LOB	TF	LOB	4	26	2.723	up	chr02	+	K04733 interleukin-1 receptor-associated kinase 4 [EC:2.7.11.1] | (RefSeq) uncharacterized protein LOC100501207 isoform X1 (A)	--	M domain of GW182
Lsi07G004920	AUX/IAA	TR	AUX/IAA	5	31	2.657	up	chr07	-	K14484 auxin-responsive protein IAA | (RefSeq) auxin-induced protein AUX22-like (A)	GO:0005634,nucleus; GO:0009734,auxin-activated signaling pathway; GO:0006355,regulation of transcription, DNA-templated; GO:0006351,transcription, DNA-templated	AUX/IAA family
Lsi02G008980	Tify	TF	Tify	10	58	2.595	up	chr02	+	K13464 jasmonate ZIM domain-containing protein | (RefSeq) protein TIFY 9 (A)	GO:0005634,nucleus; GO:0003714,transcription corepressor activity; GO:0006952,defense response; GO:1903507,negative regulation of nucleic acid-templated transcription; GO:0031347,regulation of defense response; GO:2000022,regulation of jasmonic acid mediated signaling pathway; GO:0006355,regulation of transcription, DNA-templated; GO:0009611,response to wounding; GO:0006351,transcription, DNA-tem…	Divergent CCT motif
Lsi04G014460	HB-HD-ZIP	TF	HB->HB-HD-ZIP	54	312	2.554	up	chr04	-	K09338 homeobox-leucine zipper protein | (RefSeq) homeobox-leucine zipper protein HAT9-like (A)	GO:0005634,nucleus; GO:0003700,DNA-binding transcription factor activity; GO:0043565,sequence-specific DNA binding; GO:0006351,transcription, DNA-templated	--
Lsi09G016880	AP2/ERF-ERF	TF	AP2/ERF->AP2/ERF-ERF	13	70	2.47	up	chr09	-	K09286 EREBP-like factor | (RefSeq) dehydration-responsive element-binding protein 3-like (A)	GO:0005634,nucleus; GO:0003677,DNA binding; GO:0003700,DNA-binding transcription factor activity; GO:0009873,ethylene-activated signaling pathway; GO:0006351,transcription, DNA-templated	AP2 domain
Lsi05G004490	bHLH	TF	bHLH	214	1162	2.444	up	chr05	-	--	GO:0005634,nucleus; GO:0003677,DNA binding; GO:0003700,DNA-binding transcription factor activity; GO:0046983,protein dimerization activity; GO:0045893,positive regulation of transcription, DNA-templated; GO:0009409,response to cold; GO:0050826,response to freezing; GO:0010440,stomatal lineage progression; GO:0006351,transcription, DNA-templated	Helix-loop-helix DNA-binding domain
Lsi02G028120	AUX/IAA	TR	AUX/IAA	482	2519	2.384	up	chr02	+	K14484 auxin-responsive protein IAA | (RefSeq) auxin-responsive protein IAA21-like (A)	GO:0005634,nucleus; GO:0009734,auxin-activated signaling pathway; GO:1901332,negative regulation of lateral root development; GO:0006355,regulation of transcription, DNA-templated; GO:0006351,transcription, DNA-templated	AUX/IAA family
Lsi05G010110	AP2/ERF-ERF	TF	AP2/ERF->AP2/ERF-ERF	11	55	2.382	up	chr05	+	K14516 ethylene-responsive transcription factor 1 | (RefSeq) ethylene-responsive transcription factor 1B-like (A)	GO:0005634,nucleus; GO:0003677,DNA binding; GO:0003700,DNA-binding transcription factor activity; GO:0006952,defense response; GO:0009873,ethylene-activated signaling pathway; GO:0009867,jasmonic acid mediated signaling pathway; GO:0006351,transcription, DNA-templated	Calcium signal-modulating cyclophilin ligand
Lsi04G024060	NAC	TF	NAC	2290	11779	2.363	up	chr04	-	K00521 ferric-chelate reductase [EC:1.16.1.7] | (RefSeq) ferric reduction oxidase 7, chloroplastic-like (A)	GO:0005634,nucleus; GO:0003677,DNA binding; GO:0003700,DNA-binding transcription factor activity; GO:0009793,embryo development ending in seed dormancy; GO:1900057,positive regulation of leaf senescence; GO:0045893,positive regulation of transcription, DNA-templated; GO:0006351,transcription, DNA-templated	--
Lsi10G005220	AP2/ERF-ERF	TF	AP2/ERF->AP2/ERF-ERF	68	326	2.263	up	chr10	+	K09286 EREBP-like factor | (RefSeq) ethylene-responsive transcription factor ERF011 (A)	GO:0005634,nucleus; GO:0003677,DNA binding; GO:0003700,DNA-binding transcription factor activity; GO:0009873,ethylene-activated signaling pathway; GO:0006351,transcription, DNA-templated	AP2 domain
Lsi09G019140	MADS-MIKC	TF	MADS->MADS-MIKC	421	1961	2.218	up	chr09	+	K09260 MADS-box transcription enhancer factor 2A | (RefSeq) MADS-box protein SOC1 isoform X1 (A)	GO:0005737,cytoplasm; GO:0005634,nucleus; GO:0003700,DNA-binding transcription factor activity; GO:0046983,protein dimerization activity; GO:0000977,RNA polymerase II regulatory region sequence-specific DNA binding; GO:0008134,transcription factor binding; GO:0030154,cell differentiation; GO:0009908,flower development; GO:0010077,maintenance of inflorescence meristem identity; GO:0009911,positive…	K-box region
Lsi05G021300	bHLH	TF	bHLH	2403	11075	2.205	up	chr05	-	K13422 transcription factor MYC2 | (RefSeq) transcription factor MYC2-like (A)	GO:0005737,cytoplasm; GO:0005634,nucleus; GO:0003700,DNA-binding transcription factor activity; GO:0046983,protein dimerization activity; GO:0044212,transcription regulatory region DNA binding; GO:0010629,negative regulation of gene expression; GO:0006355,regulation of transcription, DNA-templated; GO:0006351,transcription, DNA-templated	Helix-loop-helix DNA-binding domain
Lsi08G004170	AP2/ERF-ERF	TF	AP2/ERF->AP2/ERF-ERF	14	65	2.188	up	chr08	-	K09286 EREBP-like factor | (RefSeq) hypothetical protein (A)	GO:0005634,nucleus; GO:0003700,DNA-binding transcription factor activity; GO:0043565,sequence-specific DNA binding; GO:0044212,transcription regulatory region DNA binding; GO:0071497,cellular response to freezing; GO:0034605,cellular response to heat; GO:0009873,ethylene-activated signaling pathway; GO:0045893,positive regulation of transcription, DNA-templated; GO:0009753,response to jasmonic ac…	AP2 domain
Lsi04G011120	Others	TR	Others	5848	25619	2.131	up	chr04	-	K13464 jasmonate ZIM domain-containing protein | (RefSeq) protein TIFY 6B-like (A)	--	--
Lsi02G025770	MYB	TF	MYB->MYB	4	17	2.118	up	chr02	-	K09422 transcription factor MYB, plant | (RefSeq) transcription factor MYB46 (A)	GO:0005634,nucleus; GO:0003700,DNA-binding transcription factor activity; GO:0000981,DNA-binding transcription factor activity, RNA polymerase II-specific; GO:0043565,sequence-specific DNA binding; GO:0001135,RNA polymerase II transcription regulator recruiting activity; GO:0044212,transcription regulatory region DNA binding; GO:0030154,cell differentiation; GO:0045893,positive regulation of tran…	Myb-like DNA-binding domain
Lsi08G004490	NAC	TF	NAC	2720	11419	2.07	up	chr08	-	K00521 ferric-chelate reductase [EC:1.16.1.7] | (RefSeq) ferric reduction oxidase 7, chloroplastic-like (A)	GO:0005634,nucleus; GO:0043565,sequence-specific DNA binding; GO:1901002,positive regulation of response to salt stress; GO:1902584,positive regulation of response to water deprivation; GO:0045893,positive regulation of transcription, DNA-templated; GO:1900150,regulation of defense response to fungus; GO:0040008,regulation of growth; GO:0009409,response to cold; GO:0048364,root development; GO:00…	--
Lsi07G002240	C2C2-GATA	TF	C2C2->C2C2-GATA	33	130	1.985	up	chr07	-	K21630 GATA-type zinc finger protein 1 | (RefSeq) GATA transcription factor 5 (A)	GO:0005634,nucleus; GO:0005667,transcription factor complex; GO:0003682,chromatin binding; GO:0003700,DNA-binding transcription factor activity; GO:0000977,RNA polymerase II regulatory region sequence-specific DNA binding; GO:0001085,RNA polymerase II transcription factor binding; GO:0001228,DNA-binding transcription activator activity, RNA polymerase II-specific; GO:0008270,zinc ion binding; GO:…	GATA zinc finger
Lsi09G010160	bHLH	TF	bHLH	150	586	1.957	up	chr09	+	K22484 transcriptional regulator CBF1 | (RefSeq) transcription factor bHLH106 (A)	GO:0005634,nucleus; GO:0003677,DNA binding; GO:0003700,DNA-binding transcription factor activity; GO:0046983,protein dimerization activity; GO:0006355,regulation of transcription, DNA-templated; GO:0006351,transcription, DNA-templated	Helix-loop-helix DNA-binding domain
Lsi07G002160	C2H2	TF	C2H2	616	2362	1.937	up	chr07	+	K12309 beta-galactosidase [EC:3.2.1.23] | (Kazusa) Lj3g3v0323160.1; - (A)	GO:0003677,DNA binding; GO:0003700,DNA-binding transcription factor activity; GO:0046872,metal ion binding; GO:0006355,regulation of transcription, DNA-templated; GO:0006351,transcription, DNA-templated	Zinc-finger of C2H2 type
Lsi06G014540	NAC	TF	NAC	133	503	1.922	up	chr06	-	K16296 serine carboxypeptidase-like clade I [EC:3.4.16.-] | (RefSeq) serine carboxypeptidase 1-like isoform X1 (A)	GO:0005634,nucleus; GO:0003677,DNA binding; GO:0003700,DNA-binding transcription factor activity; GO:0006351,transcription, DNA-templated	--
Lsi01G017900	Others	TR	Others	206	756	1.873	up	chr01	+	K14492 two-component response regulator ARR-A family | (RefSeq) two-component response regulator ARR8 (A)	GO:0005634,nucleus; GO:0000156,phosphorelay response regulator activity; GO:0007623,circadian rhythm; GO:0009736,cytokinin-activated signaling pathway; GO:0000160,phosphorelay signal transduction system; GO:0006355,regulation of transcription, DNA-templated; GO:0009735,response to cytokinin; GO:0006351,transcription, DNA-templated	Response regulator receiver domain
Lsi02G013810	Others	TR	Others	16	60	1.856	up	chr02	-	--	GO:0005634,nucleus	CCT motif
Lsi05G016950	C2H2	TF	C2H2	21	77	1.853	up	chr05	+	K08081 tropinone reductase I [EC:1.1.1.206] | (RefSeq) tropinone reductase homolog At5g06060-like (A)	GO:0005634,nucleus; GO:0003677,DNA binding; GO:0003700,DNA-binding transcription factor activity; GO:0046872,metal ion binding; GO:0051973,positive regulation of telomerase activity; GO:0006355,regulation of transcription, DNA-templated; GO:0006351,transcription, DNA-templated	Zinc finger, C2H2 type
Lsi08G009900	bHLH	TF	bHLH	134	483	1.853	up	chr08	-	K18485 myogenic factor 6 | (RefSeq) transcription factor bHLH96 (A)	GO:0005634,nucleus; GO:0003677,DNA binding; GO:0003700,DNA-binding transcription factor activity; GO:0046983,protein dimerization activity; GO:0006351,transcription, DNA-templated	--
Lsi01G001380	Tify	TF	Tify	215	766	1.834	up	chr01	-	--	GO:0005634,nucleus; GO:0003714,transcription corepressor activity; GO:0006952,defense response; GO:1903507,negative regulation of nucleic acid-templated transcription; GO:0031347,regulation of defense response; GO:2000022,regulation of jasmonic acid mediated signaling pathway; GO:0006355,regulation of transcription, DNA-templated; GO:0009611,response to wounding; GO:0006351,transcription, DNA-tem…	Divergent CCT motif
Lsi05G017320	MYB	TF	MYB->MYB	27	96	1.821	up	chr05	+	K09422 transcription factor MYB, plant | (RefSeq) myb-related protein Myb4-like (A)	GO:0005634,nucleus; GO:0000981,DNA-binding transcription factor activity, RNA polymerase II-specific; GO:0043565,sequence-specific DNA binding; GO:0001135,RNA polymerase II transcription regulator recruiting activity; GO:0044212,transcription regulatory region DNA binding; GO:0030154,cell differentiation; GO:0045893,positive regulation of transcription, DNA-templated; GO:0006357,regulation of tra…	SLIDE
Lsi09G000090	C2C2-Dof	TF	C2C2->C2C2-Dof	96	336	1.818	up	chr09	-	K04733 interleukin-1 receptor-associated kinase 4 [EC:2.7.11.1] | (RefSeq) putative receptor-like protein kinase At5g39000 isoform X1 (A)	GO:0005634,nucleus; GO:0003677,DNA binding; GO:0046872,metal ion binding; GO:0006355,regulation of transcription, DNA-templated; GO:0006351,transcription, DNA-templated	Dof domain, zinc finger
Lsi03G019300	Trihelix	TF	Trihelix	32	112	1.811	up	chr03	+	K01051 pectinesterase [EC:3.1.1.11] | (RefSeq) probable pectinesterase/pectinesterase inhibitor 58 (A)	GO:0005634,nucleus; GO:0003677,DNA binding; GO:0003700,DNA-binding transcription factor activity; GO:0042803,protein homodimerization activity; GO:0048498,establishment of petal orientation; GO:0046621,negative regulation of organ growth; GO:0090428,perianth development; GO:0048441,petal development; GO:0009909,regulation of flower development; GO:0006355,regulation of transcription, DNA-template…	Myb/SANT-like DNA-binding domain
Lsi11G004460	AUX/IAA	TR	AUX/IAA	503	1759	1.805	up	chr11	+	K14484 auxin-responsive protein IAA | (RefSeq) CSIAA3; auxin-responsive protein IAA4 (A)	GO:0005634,nucleus; GO:0009734,auxin-activated signaling pathway; GO:0006355,regulation of transcription, DNA-templated; GO:0006351,transcription, DNA-templated	AUX/IAA family
Lsi06G003540	Tify	TF	Tify	7366	25698	1.803	up	chr06	+	K13464 jasmonate ZIM domain-containing protein | (RefSeq) protein TIFY 10A (A)	GO:0006355,regulation of transcription, DNA-templated; GO:0006351,transcription, DNA-templated	Divergent CCT motif
Lsi02G027610	AUX/IAA	TR	AUX/IAA	125	437	1.802	up	chr02	-	K14484 auxin-responsive protein IAA | (RefSeq) auxin-induced protein AUX22-like (A)	GO:0005634,nucleus; GO:0009734,auxin-activated signaling pathway; GO:0006355,regulation of transcription, DNA-templated; GO:0006351,transcription, DNA-templated	AUX/IAA family
Lsi09G016530	bHLH	TF	bHLH	14	49	1.797	up	chr09	-	K13422 transcription factor MYC2 | (RefSeq) transcription factor MYC2-like (A)	GO:0005737,cytoplasm; GO:0005634,nucleus; GO:0003677,DNA binding; GO:0003700,DNA-binding transcription factor activity; GO:0046983,protein dimerization activity; GO:0010629,negative regulation of gene expression; GO:0006355,regulation of transcription, DNA-templated; GO:0006351,transcription, DNA-templated	Helix-loop-helix DNA-binding domain
Lsi02G029600	bHLH	TF	bHLH	87	303	1.791	up	chr02	+	K10863 aprataxin [EC:3.1.11.7 3.1.11.8 3.1.12.2] | (RefSeq) basic helix-loop-helix family protein (A)	GO:0005634,nucleus; GO:0003677,DNA binding; GO:0003700,DNA-binding transcription factor activity; GO:0046983,protein dimerization activity; GO:0006355,regulation of transcription, DNA-templated; GO:0006351,transcription, DNA-templated	Helix-loop-helix DNA-binding domain
Lsi06G001220	C2H2	TF	C2H2	20	70	1.749	up	chr06	-	K22410 PR domain zinc finger protein 16 | (RefSeq) protein indeterminate-domain 2-like (A)	GO:0003677,DNA binding; GO:0003700,DNA-binding transcription factor activity; GO:0046872,metal ion binding; GO:0006355,regulation of transcription, DNA-templated; GO:0006351,transcription, DNA-templated	MYST family zinc finger domain
Lsi08G014890	HB-WOX	TF	HB->HB-WOX	20	67	1.741	up	chr08	-	K14292 trimethylguanosine synthase [EC:2.1.1.-] | (RefSeq) uncharacterized LOC107850838 (A)	GO:0005634,nucleus; GO:0003677,DNA binding; GO:0051301,cell division; GO:0010087,phloem or xylem histogenesis; GO:0010067,procambium histogenesis; GO:0006355,regulation of transcription, DNA-templated; GO:0007165,signal transduction; GO:0006351,transcription, DNA-templated	Homeodomain
Lsi06G011800	AP2/ERF-AP2	TF	AP2/ERF->AP2/ERF-AP2	13	42	1.738	up	chr06	+	K09285 AP2-like factor, ANT lineage | (RefSeq) AP2-like ethylene-responsive transcription factor AIL5 (A)	GO:0005634,nucleus; GO:0003677,DNA binding; GO:0003700,DNA-binding transcription factor activity; GO:0060774,auxin mediated signaling pathway involved in phyllotactic patterning; GO:0009873,ethylene-activated signaling pathway; GO:0010311,lateral root formation; GO:0060772,leaf phyllotactic patterning; GO:0060771,phyllotactic patterning; GO:0040019,positive regulation of embryonic development; GO…	AP2 domain
Lsi01G009780	HSF	TF	HSF	346	1138	1.717	up	chr01	+	K09419 heat shock transcription factor, other eukaryote | (RefSeq) heat shock factor protein HSF24 (A)	GO:0005634,nucleus; GO:0003700,DNA-binding transcription factor activity; GO:0043565,sequence-specific DNA binding; GO:0006351,transcription, DNA-templated	PDZ domain of MCC-2 bdg protein for Usher syndrome
Lsi11G010150	AP2/ERF-ERF	TF	AP2/ERF->AP2/ERF-ERF	108	345	1.68	up	chr11	+	K09286 EREBP-like factor | (RefSeq) ethylene-responsive transcription factor ERF011-like (A)	GO:0005634,nucleus; GO:0003677,DNA binding; GO:0003700,DNA-binding transcription factor activity; GO:0009873,ethylene-activated signaling pathway; GO:0010200,response to chitin; GO:0006351,transcription, DNA-templated	AP2 domain
Lsi05G021290	Coactivator p15	TR	Coactivator p15	672	2150	1.679	up	chr05	+	K21867 potassium channel | (RefSeq) potassium channel AKT2/3-like (A)	GO:0005634,nucleus; GO:0005667,transcription factor complex; GO:0003677,DNA binding; GO:0003713,transcription coactivator activity; GO:0060261,positive regulation of transcription initiation from RNA polymerase II promoter; GO:0006351,transcription, DNA-templated	Zinc knuckle
Lsi04G002910	NAC	TF	NAC	639	2035	1.672	up	chr04	-	--	GO:0005634,nucleus; GO:0003700,DNA-binding transcription factor activity; GO:0043565,sequence-specific DNA binding; GO:0000077,DNA damage checkpoint; GO:0040020,regulation of meiotic nuclear division; GO:0010332,response to gamma radiation; GO:0006351,transcription, DNA-templated	No apical meristem (NAM) protein
Lsi06G009160	GRAS	TF	GRAS	233	744	1.669	up	chr06	-	K14494 DELLA protein | (RefSeq) DELLA protein GAI (A)	GO:0005634,nucleus; GO:0003700,DNA-binding transcription factor activity; GO:0043565,sequence-specific DNA binding; GO:0000989,NA; GO:0009740,gibberellic acid mediated signaling pathway; GO:0033206,meiotic cytokinesis; GO:0007275,multicellular organism development; GO:1905614,negative regulation of developmental vegetative growth; GO:0010629,negative regulation of gene expression; GO:0009938,nega…	Transcriptional regulator DELLA protein N terminal
Lsi02G012570	GNAT	TR	GNAT	63	199	1.658	up	chr02	-	--	GO:0008080,N-acetyltransferase activity; GO:0016747,transferase activity, transferring acyl groups other than amino-acyl groups; GO:0006473,protein acetylation	Acetyltransferase (GNAT) domain
Lsi02G014500	C2C2-Dof	TF	C2C2->C2C2-Dof	45	143	1.656	up	chr02	-	K20043 clathrin coat assembly protein AP180 | (RefSeq) putative clathrin assembly protein At5g35200 (A)	GO:0005634,nucleus; GO:0003700,DNA-binding transcription factor activity; GO:0046872,metal ion binding; GO:0044212,transcription regulatory region DNA binding; GO:0006355,regulation of transcription, DNA-templated; GO:0048364,root development; GO:0006351,transcription, DNA-templated	Dof domain, zinc finger
Lsi09G008630	TCP	TF	TCP	279	875	1.65	up	chr09	-	K16221 transcription factor TCP21 (protein CCA1 HIKING EXPEDITION) | (RefSeq) transcription factor TCP21-like (A)	GO:0005634,nucleus; GO:0003677,DNA binding; GO:0003700,DNA-binding transcription factor activity; GO:0006355,regulation of transcription, DNA-templated; GO:0006351,transcription, DNA-templated	TCP family transcription factor
Lsi03G002790	TRAF	TR	TRAF	15	46	1.645	up	chr03	+	K10523 speckle-type POZ protein | (RefSeq) BTB/POZ domain-containing protein At3g56230 (A)	GO:0005737,cytoplasm; GO:0019005,SCF ubiquitin ligase complex; GO:0031625,ubiquitin protein ligase binding; GO:0043161,proteasome-mediated ubiquitin-dependent protein catabolic process; GO:0042787,NA; GO:0030162,regulation of proteolysis	BTB And C-terminal Kelch
Lsi09G018410	GRAS	TF	GRAS	31	97	1.627	up	chr09	+	K14494 DELLA protein | (RefSeq) DELLA protein RGL3 (A)	GO:0005769,early endosome; GO:0005770,late endosome; GO:0005634,nucleus; GO:0055037,recycling endosome; GO:0003700,DNA-binding transcription factor activity; GO:0043565,sequence-specific DNA binding; GO:0008356,asymmetric cell division; GO:0055072,iron ion homeostasis; GO:0048366,leaf development; GO:0045930,negative regulation of mitotic cell cycle; GO:0009956,radial pattern formation; GO:003235…	GRAS domain family
Lsi09G003090	AP2/ERF-ERF	TF	AP2/ERF->AP2/ERF-ERF	31	93	1.593	up	chr09	+	K09286 EREBP-like factor | (RefSeq) dehydration-responsive element-binding protein 1B (A)	GO:0005634,nucleus; GO:0003677,DNA binding; GO:0003700,DNA-binding transcription factor activity; GO:0009873,ethylene-activated signaling pathway; GO:0006351,transcription, DNA-templated	AP2 domain
Lsi11G006680	MYB	TF	MYB->MYB	65	191	1.561	up	chr11	+	K09422 transcription factor MYB, plant | (RefSeq) transcription factor MYB86-like (A)	GO:0005634,nucleus; GO:0000981,DNA-binding transcription factor activity, RNA polymerase II-specific; GO:0043565,sequence-specific DNA binding; GO:0001135,RNA polymerase II transcription regulator recruiting activity; GO:0044212,transcription regulatory region DNA binding; GO:0030154,cell differentiation; GO:0006357,regulation of transcription by RNA polymerase II; GO:0006351,transcription, DNA-t…	Myb-like DNA-binding domain
Lsi07G000040	NAC	TF	NAC	2878	8476	1.558	up	chr07	-	K00521 ferric-chelate reductase [EC:1.16.1.7] | (RefSeq) ferric reduction oxidase 7, chloroplastic-like (A)	GO:0005634,nucleus; GO:0003677,DNA binding; GO:0003700,DNA-binding transcription factor activity; GO:0010150,leaf senescence; GO:0045892,negative regulation of transcription, DNA-templated; GO:0009737,response to abscisic acid; GO:0009651,response to salt stress; GO:0006351,transcription, DNA-templated; GO:0016032,viral process; GO:0010089,xylem development	No apical meristem (NAM) protein
Lsi04G015480	HSF	TF	HSF	13	38	1.543	up	chr04	+	K09419 heat shock transcription factor, other eukaryote | (RefSeq) heat stress transcription factor B-4-like (A)	GO:0005737,cytoplasm; GO:0005634,nucleus; GO:0003700,DNA-binding transcription factor activity; GO:0043565,sequence-specific DNA binding; GO:0008356,asymmetric cell division; GO:0006351,transcription, DNA-templated	HSF-type DNA-binding
Lsi08G007560	bHLH	TF	bHLH	186	539	1.537	up	chr08	+	K04733 interleukin-1 receptor-associated kinase 4 [EC:2.7.11.1] | (RefSeq) probable receptor-like protein kinase At5g38990 (A)	GO:0005634,nucleus; GO:0003677,DNA binding; GO:0046983,protein dimerization activity; GO:0006355,regulation of transcription, DNA-templated; GO:0006351,transcription, DNA-templated	Helix-loop-helix DNA-binding domain
Lsi04G013020	NAC	TF	NAC	769	2212	1.524	up	chr04	-	K00521 ferric-chelate reductase [EC:1.16.1.7] | (RefSeq) ferric reduction oxidase 7, chloroplastic-like (A)	GO:0005634,nucleus; GO:0003677,DNA binding; GO:0003700,DNA-binding transcription factor activity; GO:0009867,jasmonic acid mediated signaling pathway; GO:0009414,response to water deprivation; GO:0006351,transcription, DNA-templated	--
Lsi08G000280	MYB	TF	MYB->MYB	783	2246	1.522	up	chr08	+	K09422 transcription factor MYB, plant | (RefSeq) transcription repressor MYB6 (A)	GO:0005634,nucleus; GO:0003700,DNA-binding transcription factor activity; GO:0000981,DNA-binding transcription factor activity, RNA polymerase II-specific; GO:0043565,sequence-specific DNA binding; GO:0001135,RNA polymerase II transcription regulator recruiting activity; GO:0044212,transcription regulatory region DNA binding; GO:0030154,cell differentiation; GO:0006357,regulation of transcription…	Myb-like DNA-binding domain
Lsi05G014110	WRKY	TF	WRKY	34	98	1.517	up	chr05	-	K12835 ATP-dependent RNA helicase DDX42 [EC:3.6.4.13] | (RefSeq) DEAD-box ATP-dependent RNA helicase 24 isoform X1 (A)	GO:0005634,nucleus; GO:0003677,DNA binding; GO:0003700,DNA-binding transcription factor activity; GO:0043565,sequence-specific DNA binding; GO:0042742,defense response to bacterium; GO:0045893,positive regulation of transcription, DNA-templated; GO:0009617,response to bacterium; GO:0010200,response to chitin; GO:0006351,transcription, DNA-templated	WRKY DNA -binding domain
Lsi01G008570	HB-HD-ZIP	TF	HB->HB-HD-ZIP	1977	5548	1.488	up	chr01	-	K09338 homeobox-leucine zipper protein | (RefSeq) homeobox-leucine zipper protein HAT22-like (A)	GO:0005634,nucleus; GO:0003700,DNA-binding transcription factor activity; GO:0043565,sequence-specific DNA binding; GO:0009738,abscisic acid-activated signaling pathway; GO:0009737,response to abscisic acid; GO:0009735,response to cytokinin; GO:0009414,response to water deprivation; GO:0006351,transcription, DNA-templated	--
Lsi07G001170	AP2/ERF-ERF	TF	AP2/ERF->AP2/ERF-ERF	318	888	1.482	up	chr07	-	K09286 EREBP-like factor | (RefSeq) ethylene-responsive transcription factor 2-like (A)	GO:0005634,nucleus; GO:0003677,DNA binding; GO:0003700,DNA-binding transcription factor activity; GO:0006952,defense response; GO:0009873,ethylene-activated signaling pathway; GO:0006351,transcription, DNA-templated	Family of unknown function (DUF5529)
Lsi10G008010	NAC	TF	NAC	1378	3806	1.465	up	chr10	-	K00521 ferric-chelate reductase [EC:1.16.1.7] | (RefSeq) ferric reduction oxidase 7, chloroplastic-like (A)	GO:0005634,nucleus; GO:0043565,sequence-specific DNA binding; GO:1901002,positive regulation of response to salt stress; GO:1902584,positive regulation of response to water deprivation; GO:0045893,positive regulation of transcription, DNA-templated; GO:0006351,transcription, DNA-templated	--
Lsi04G012510	C2H2	TF	C2H2	270	744	1.463	up	chr04	+	--	GO:0003676,nucleic acid binding	--
Lsi11G000460	GARP-G2-like	TF	GARP->GARP-G2-like	24	67	1.462	up	chr11	+	K08026 one cut domain, family member 1, hepatocyte nuclear factor 6 | (RefSeq) probable transcription factor KAN2 (A)	GO:0005634,nucleus; GO:0003677,DNA binding; GO:0003700,DNA-binding transcription factor activity; GO:0006355,regulation of transcription, DNA-templated; GO:0006351,transcription, DNA-templated	Myb-like DNA-binding domain
Lsi07G010130	C2H2	TF	C2H2	45	122	1.457	up	chr07	+	K20221 importin-4 | (RefSeq) PREDICTED: similar to Zinc finger protein 271 (Zinc finger protein 7) (HZF7) (Zinc finger protein ZNFphex133) (Epstein-Barr virus-induced zinc finger protein) (ZNF-EB) (CT-ZFP48) (Zinc finger protein (A)	GO:0005634,nucleus; GO:0003700,DNA-binding transcription factor activity; GO:0046872,metal ion binding; GO:0043565,sequence-specific DNA binding; GO:0006355,regulation of transcription, DNA-templated; GO:0006351,transcription, DNA-templated	C2H2 type zinc-finger (2 copies)
LsiUNG000150	Jumonji	TR	Jumonji	128	349	1.444	up	chr00	-	K11446 histone demethylase JARID1 [EC:1.14.11.-] | (RefSeq) lysine-specific demethylase JMJ706-like (A)	GO:0000792,heterochromatin; GO:0005634,nucleus; GO:0051213,dioxygenase activity; GO:0032454,histone demethylase activity (H3-K9 specific); GO:0046872,metal ion binding; GO:0048439,flower morphogenesis; GO:0045815,positive regulation of gene expression, epigenetic; GO:0006355,regulation of transcription, DNA-templated; GO:0006351,transcription, DNA-templated	--
Lsi02G008360	BES1	TF	BES1	171	464	1.437	up	chr02	+	K14503 brassinosteroid resistant 1/2 | (RefSeq) BES1/BZR1 homolog protein 3-like (A)	GO:0003677,DNA binding; GO:0003700,DNA-binding transcription factor activity; GO:0009742,brassinosteroid mediated signaling pathway; GO:0006355,regulation of transcription, DNA-templated; GO:0006351,transcription, DNA-templated	BES1/BZR1 plant transcription factor, N-terminal
Lsi02G001780	AP2/ERF-ERF	TF	AP2/ERF->AP2/ERF-ERF	763	2062	1.433	up	chr02	+	K13434 pathogenesis-related genes transcriptional activator PTI6 | (RefSeq) pathogenesis-related genes transcriptional activator PTI6-like (A)	GO:0005737,cytoplasm; GO:0005634,nucleus; GO:0003677,DNA binding; GO:0003700,DNA-binding transcription factor activity; GO:0009736,cytokinin-activated signaling pathway; GO:0009873,ethylene-activated signaling pathway; GO:0048366,leaf development; GO:0006351,transcription, DNA-templated	AP2 domain
Lsi03G013330	bHLH	TF	bHLH	23	62	1.429	up	chr03	-	K22484 transcriptional regulator CBF1 | (RefSeq) transcription factor bHLH106-like (A)	GO:0009941,chloroplast envelope; GO:0005634,nucleus; GO:0003677,DNA binding; GO:0003700,DNA-binding transcription factor activity; GO:0046983,protein dimerization activity; GO:0042538,hyperosmotic salinity response; GO:0006355,regulation of transcription, DNA-templated; GO:0006351,transcription, DNA-templated	--
Lsi08G014100	C2H2	TF	C2H2	343	913	1.412	up	chr08	+	K22410 PR domain zinc finger protein 16 | (RefSeq) protein indeterminate-domain 2-like (A)	GO:0003677,DNA binding; GO:0003700,DNA-binding transcription factor activity; GO:0046872,metal ion binding; GO:0006355,regulation of transcription, DNA-templated; GO:0006351,transcription, DNA-templated	C2H2-type zinc finger
Lsi04G000720	C2C2-GATA	TF	C2C2->C2C2-GATA	1287	3394	1.399	up	chr04	-	K21630 GATA-type zinc finger protein 1 | (RefSeq) GATA transcription factor 11-like (A)	GO:0005634,nucleus; GO:0005667,transcription factor complex; GO:0003682,chromatin binding; GO:0003700,DNA-binding transcription factor activity; GO:0000977,RNA polymerase II regulatory region sequence-specific DNA binding; GO:0001085,RNA polymerase II transcription factor binding; GO:0001228,DNA-binding transcription activator activity, RNA polymerase II-specific; GO:0008270,zinc ion binding; GO:…	GATA zinc finger
Lsi03G012950	C2C2-GATA	TF	C2C2->C2C2-GATA	66	172	1.378	up	chr03	-	K21630 GATA-type zinc finger protein 1 | (RefSeq) GATA transcription factor 2-like (A)	GO:0005634,nucleus; GO:0005667,transcription factor complex; GO:0003682,chromatin binding; GO:0003700,DNA-binding transcription factor activity; GO:0000977,RNA polymerase II regulatory region sequence-specific DNA binding; GO:0001085,RNA polymerase II transcription factor binding; GO:0001228,DNA-binding transcription activator activity, RNA polymerase II-specific; GO:0008270,zinc ion binding; GO:…	GATA zinc finger
Lsi04G015930	MYB	TF	MYB->MYB	118	303	1.358	up	chr04	+	K09422 transcription factor MYB, plant | (RefSeq) LOW QUALITY PROTEIN: transcription factor MYB44 (A)	GO:0005634,nucleus; GO:0003700,DNA-binding transcription factor activity; GO:0000981,DNA-binding transcription factor activity, RNA polymerase II-specific; GO:0043565,sequence-specific DNA binding; GO:0001135,RNA polymerase II transcription regulator recruiting activity; GO:0044212,transcription regulatory region DNA binding; GO:0030154,cell differentiation; GO:0048527,lateral root development; G…	SLIDE
Lsi09G003920	NAC	TF	NAC	17	43	1.349	up	chr09	+	K00521 ferric-chelate reductase [EC:1.16.1.7] | (RefSeq) ferric reduction oxidase 7, chloroplastic-like (A)	GO:0005634,nucleus; GO:0003700,DNA-binding transcription factor activity; GO:0043565,sequence-specific DNA binding; GO:0071555,cell wall organization; GO:0007275,multicellular organism development; GO:1901348,positive regulation of secondary cell wall biogenesis; GO:0006355,regulation of transcription, DNA-templated; GO:0006351,transcription, DNA-templated; GO:0048759,xylem vessel member cell dif…	No apical meristem (NAM) protein
Lsi04G015340	AP2/ERF-ERF	TF	AP2/ERF->AP2/ERF-ERF	281	714	1.347	up	chr04	+	K09286 EREBP-like factor | (RefSeq) ethylene-responsive transcription factor ERF011-like (A)	GO:0005634,nucleus; GO:0003677,DNA binding; GO:0003700,DNA-binding transcription factor activity; GO:0042742,defense response to bacterium; GO:0009873,ethylene-activated signaling pathway; GO:0010941,regulation of cell death; GO:0009617,response to bacterium; GO:0010200,response to chitin; GO:0009409,response to cold; GO:0006351,transcription, DNA-templated	AP2 domain
Lsi04G002930	bHLH	TF	bHLH	33	84	1.326	up	chr04	-	K22484 transcriptional regulator CBF1 | (RefSeq) transcription factor bHLH106-like (A)	GO:0005634,nucleus; GO:0003677,DNA binding; GO:0003700,DNA-binding transcription factor activity; GO:0046983,protein dimerization activity; GO:0006355,regulation of transcription, DNA-templated; GO:0006351,transcription, DNA-templated	Helix-loop-helix DNA-binding domain
Lsi06G005500	GRAS	TF	GRAS	133	331	1.307	up	chr06	-	K14494 DELLA protein | (RefSeq) DELLA protein GAIP-B-like (A)	GO:0005634,nucleus; GO:0003700,DNA-binding transcription factor activity; GO:0043565,sequence-specific DNA binding; GO:0000989,NA; GO:0006355,regulation of transcription, DNA-templated; GO:0009739,response to gibberellin; GO:0006351,transcription, DNA-templated	GRAS domain family
Lsi04G021330	AP2/ERF-ERF	TF	AP2/ERF->AP2/ERF-ERF	335	822	1.298	up	chr04	+	K13434 pathogenesis-related genes transcriptional activator PTI6 | (RefSeq) pathogenesis-related genes transcriptional activator PTI6-like (A)	GO:0005634,nucleus; GO:0003677,DNA binding; GO:0003700,DNA-binding transcription factor activity; GO:0009873,ethylene-activated signaling pathway; GO:0006351,transcription, DNA-templated	AP2 domain
Lsi11G010290	GARP-G2-like	TF	GARP->GARP-G2-like	78	191	1.288	up	chr11	-	--	GO:0005829,cytosol; GO:0005634,nucleus; GO:0003700,DNA-binding transcription factor activity; GO:0044212,transcription regulatory region DNA binding; GO:0048449,floral organ formation; GO:0010629,negative regulation of gene expression; GO:0006355,regulation of transcription, DNA-templated; GO:0090701,specification of plant organ identity; GO:0006351,transcription, DNA-templated	Myb-like DNA-binding domain
Lsi02G002450	Others	TR	Others	4674	11397	1.286	up	chr02	-	K13464 jasmonate ZIM domain-containing protein | (RefSeq) protein TIFY 6B-like isoform X1 (A)	--	--
Lsi06G015570	MYB	TF	MYB->MYB	72	176	1.281	up	chr06	+	K09422 transcription factor MYB, plant | (RefSeq) transcription factor MYB98 (A)	GO:0005634,nucleus; GO:0003700,DNA-binding transcription factor activity; GO:0000981,DNA-binding transcription factor activity, RNA polymerase II-specific; GO:0043565,sequence-specific DNA binding; GO:0001135,RNA polymerase II transcription regulator recruiting activity; GO:0044212,transcription regulatory region DNA binding; GO:0009553,embryo sac development; GO:0010183,pollen tube guidance; GO:…	SLIDE
LsiUNG000300	bHLH	TF	bHLH	705	1693	1.263	up	chr00	+	K18485 myogenic factor 6 | (RefSeq) transcription factor bHLH96 (A)	GO:0005634,nucleus; GO:0003677,DNA binding; GO:0003700,DNA-binding transcription factor activity; GO:0046983,protein dimerization activity; GO:0006355,regulation of transcription, DNA-templated; GO:0006351,transcription, DNA-templated	Helix-loop-helix DNA-binding domain
Lsi07G002280	SWI/SNF-BAF60b	TR	SWI/SNF-BAF60b	5645	13396	1.247	up	chr07	-	K01062 platelet-activating factor acetylhydrolase [EC:3.1.1.47] | (RefSeq) hypothetical protein (A)	GO:0003677,DNA binding; GO:0046872,metal ion binding	GYF domain 2
Lsi11G014210	bZIP	TF	bZIP	182	431	1.246	up	chr11	+	K04374 cyclic AMP-dependent transcription factor ATF-4 | (RefSeq) basic leucine zipper 61-like (A)	GO:0005634,nucleus; GO:0003700,DNA-binding transcription factor activity; GO:0000977,RNA polymerase II regulatory region sequence-specific DNA binding; GO:0045893,positive regulation of transcription, DNA-templated; GO:0006351,transcription, DNA-templated	Striatin family
Lsi07G001160	AP2/ERF-ERF	TF	AP2/ERF->AP2/ERF-ERF	276	655	1.245	up	chr07	-	K09286 EREBP-like factor | (RefSeq) ethylene-responsive transcription factor ERF106 (A)	GO:0005634,nucleus; GO:0003677,DNA binding; GO:0003700,DNA-binding transcription factor activity; GO:0009873,ethylene-activated signaling pathway; GO:0006351,transcription, DNA-templated	AP2 domain
Lsi09G004260	C2H2	TF	C2H2	64	152	1.245	up	chr09	-	--	GO:0005634,nucleus; GO:0003700,DNA-binding transcription factor activity; GO:0046872,metal ion binding; GO:0044212,transcription regulatory region DNA binding; GO:0006355,regulation of transcription, DNA-templated; GO:0006351,transcription, DNA-templated	C2H2-type zinc finger
Lsi11G002040	C3H	TF	C3H	361	837	1.216	up	chr11	-	K23048 RING finger protein unkempt | (RefSeq) hypothetical protein (A)	GO:0005886,plasma membrane; GO:0003677,DNA binding; GO:0003700,DNA-binding transcription factor activity; GO:0046872,metal ion binding; GO:0006355,regulation of transcription, DNA-templated; GO:0006979,response to oxidative stress	RNA-binding, Nab2-type zinc finger
Lsi05G008180	HB-HD-ZIP	TF	HB->HB-HD-ZIP	3846	8906	1.212	up	chr05	-	K09338 homeobox-leucine zipper protein | (RefSeq) homeobox-leucine zipper protein ATHB-6-like (A)	GO:0005634,nucleus; GO:0003700,DNA-binding transcription factor activity; GO:0043565,sequence-specific DNA binding; GO:0030308,negative regulation of cell growth; GO:0048573,photoperiodism, flowering; GO:0045893,positive regulation of transcription, DNA-templated; GO:0048510,regulation of timing of transition from vegetative to reproductive phase; GO:0009637,response to blue light; GO:0006351,tra…	--
Lsi03G003000	bHLH	TF	bHLH	350	806	1.204	up	chr03	-	K22484 transcriptional regulator CBF1 | (RefSeq) transcription factor bHLH106-like (A)	GO:0005634,nucleus; GO:0003677,DNA binding; GO:0003700,DNA-binding transcription factor activity; GO:0046983,protein dimerization activity; GO:0006355,regulation of transcription, DNA-templated; GO:0006351,transcription, DNA-templated	--
Lsi11G002630	HSF	TF	HSF	764	1752	1.198	up	chr11	-	K09419 heat shock transcription factor, other eukaryote | (RefSeq) heat stress transcription factor C-1-like (A)	GO:0005634,nucleus; GO:0003700,DNA-binding transcription factor activity; GO:0043565,sequence-specific DNA binding; GO:0006351,transcription, DNA-templated	--
Lsi01G013150	TCP	TF	TCP	42	96	1.197	up	chr01	+	K16221 transcription factor TCP21 (protein CCA1 HIKING EXPEDITION) | (RefSeq) transcription factor TCP21-like (A)	GO:0005634,nucleus; GO:0003677,DNA binding; GO:0003700,DNA-binding transcription factor activity; GO:0007623,circadian rhythm; GO:0006355,regulation of transcription, DNA-templated; GO:0006351,transcription, DNA-templated	TCP family transcription factor
Lsi09G012790	AUX/IAA	TR	AUX/IAA	1765	4047	1.197	up	chr09	+	K14484 auxin-responsive protein IAA | (RefSeq) auxin-induced protein 22B-like (A)	GO:0005634,nucleus; GO:0009734,auxin-activated signaling pathway; GO:0006355,regulation of transcription, DNA-templated; GO:0006351,transcription, DNA-templated	AUX/IAA family
Lsi08G015450	GRF	TF	GRF	174	399	1.195	up	chr08	+	K22382 WD repeat-containing protein 26 | (RefSeq) WD repeat-containing protein 26 homolog (A)	GO:0005634,nucleus; GO:0005524,ATP binding; GO:0032502,developmental process; GO:0006355,regulation of transcription, DNA-templated; GO:0006351,transcription, DNA-templated	QLQ
Lsi07G002850	BES1	TF	BES1	1614	3681	1.189	up	chr07	+	K14503 brassinosteroid resistant 1/2 | (RefSeq) BES1/BZR1 homolog protein 2 (A)	GO:0003677,DNA binding; GO:0003700,DNA-binding transcription factor activity; GO:0009742,brassinosteroid mediated signaling pathway; GO:0006355,regulation of transcription, DNA-templated; GO:0006351,transcription, DNA-templated	BES1/BZR1 plant transcription factor, N-terminal
Lsi07G006610	Tify	TF	Tify	5671	12911	1.187	up	chr07	-	K13464 jasmonate ZIM domain-containing protein | (RefSeq) protein TIFY 10b-like (A)	GO:0005634,nucleus; GO:0003714,transcription corepressor activity; GO:1903507,negative regulation of nucleic acid-templated transcription; GO:0031347,regulation of defense response; GO:2000022,regulation of jasmonic acid mediated signaling pathway; GO:0006355,regulation of transcription, DNA-templated; GO:0009611,response to wounding; GO:0006351,transcription, DNA-templated	Divergent CCT motif
Lsi03G019530	HB-HD-ZIP	TF	HB->HB-HD-ZIP	107	243	1.179	up	chr03	+	K09350 homeobox protein Nkx-6.2 | (RefSeq) putative homeobox-leucine zipper protein ATHB-51 (A)	GO:0005634,nucleus; GO:0003700,DNA-binding transcription factor activity; GO:0043565,sequence-specific DNA binding; GO:0010434,bract formation; GO:0010582,floral meristem determinacy; GO:0009965,leaf morphogenesis; GO:0045893,positive regulation of transcription, DNA-templated; GO:0048510,regulation of timing of transition from vegetative to reproductive phase; GO:0006351,transcription, DNA-templ…	EAP30/Vps36 family
Lsi05G017250	AP2/ERF-ERF	TF	AP2/ERF->AP2/ERF-ERF	496	1120	1.176	up	chr05	+	K14516 ethylene-responsive transcription factor 1 | (RefSeq) ethylene-responsive transcription factor 1B (A)	GO:0005634,nucleus; GO:0003677,DNA binding; GO:0003700,DNA-binding transcription factor activity; GO:0006952,defense response; GO:0009873,ethylene-activated signaling pathway; GO:0009867,jasmonic acid mediated signaling pathway; GO:0006351,transcription, DNA-templated	AP2 domain
Lsi01G008970	GRAS	TF	GRAS	458	1028	1.167	up	chr01	+	K14494 DELLA protein | (RefSeq) DELLA protein RGL3 (A)	GO:0005769,early endosome; GO:0005770,late endosome; GO:0005634,nucleus; GO:0055037,recycling endosome; GO:0003700,DNA-binding transcription factor activity; GO:0043565,sequence-specific DNA binding; GO:0008356,asymmetric cell division; GO:0055072,iron ion homeostasis; GO:0048366,leaf development; GO:0045930,negative regulation of mitotic cell cycle; GO:0009956,radial pattern formation; GO:003235…	GRAS domain family
Lsi04G017020	bZIP	TF	bZIP	29	66	1.159	up	chr04	+	K09060 plant G-box-binding factor | (RefSeq) G-box-binding factor 1-like (A)	GO:0005634,nucleus; GO:0003700,DNA-binding transcription factor activity; GO:0046982,protein heterodimerization activity; GO:0043565,sequence-specific DNA binding; GO:0044212,transcription regulatory region DNA binding; GO:0009845,seed germination; GO:0006351,transcription, DNA-templated	Basic region leucine zipper
Lsi01G014170	C2C2-Dof	TF	C2C2->C2C2-Dof	30	68	1.158	up	chr01	+	K20043 clathrin coat assembly protein AP180 | (RefSeq) putative clathrin assembly protein At5g35200 (A)	GO:0005634,nucleus; GO:0003677,DNA binding; GO:0046872,metal ion binding; GO:0006355,regulation of transcription, DNA-templated; GO:0006351,transcription, DNA-templated	Dof domain, zinc finger
Lsi07G012820	AP2/ERF-ERF	TF	AP2/ERF->AP2/ERF-ERF	314	701	1.157	up	chr07	+	K09286 EREBP-like factor | (RefSeq) dehydration-responsive element-binding protein 3-like (A)	GO:0005634,nucleus; GO:0003677,DNA binding; GO:0003700,DNA-binding transcription factor activity; GO:0009873,ethylene-activated signaling pathway; GO:0006351,transcription, DNA-templated	AP2 domain
Lsi02G022430	AUX/IAA	TR	AUX/IAA	2190	4842	1.145	up	chr02	-	K14484 auxin-responsive protein IAA | (RefSeq) auxin-induced protein 22D-like (A)	GO:0005634,nucleus; GO:0003677,DNA binding; GO:0003700,DNA-binding transcription factor activity; GO:0043565,sequence-specific DNA binding; GO:0044212,transcription regulatory region DNA binding; GO:0009734,auxin-activated signaling pathway; GO:0009733,response to auxin; GO:0006351,transcription, DNA-templated	AUX/IAA family
Lsi01G013580	S1Fa-like	TF	S1Fa-like	87	191	1.129	up	chr01	+	K00430 peroxidase [EC:1.11.1.7] | (RefSeq) peroxidase 21-like (A)	GO:0005829,cytosol; GO:0009505,plant-type cell wall; GO:0009506,plasmodesma; GO:0020037,heme binding; GO:0046872,metal ion binding; GO:0004601,peroxidase activity; GO:0050832,defense response to fungus; GO:0042744,hydrogen peroxide catabolic process; GO:0009664,plant-type cell wall organization; GO:0006979,response to oxidative stress; GO:0048511,rhythmic process	Peroxidase
Lsi05G004870	MYB-related	TF	MYB->MYB-related	30	66	1.114	up	chr05	-	K09422 transcription factor MYB, plant | (RefSeq) transcription repressor MYB6 (A)	GO:0005634,nucleus; GO:0001046,core promoter sequence-specific DNA binding; GO:0003700,DNA-binding transcription factor activity; GO:0000981,DNA-binding transcription factor activity, RNA polymerase II-specific; GO:0043565,sequence-specific DNA binding; GO:0001135,RNA polymerase II transcription regulator recruiting activity; GO:0044212,transcription regulatory region DNA binding; GO:0030154,cell…	Myb-like DNA-binding domain
Lsi01G002710	AP2/ERF-ERF	TF	AP2/ERF->AP2/ERF-ERF	87	188	1.111	up	chr01	+	K04392 Ras-related C3 botulinum toxin substrate 1 | (RefSeq) rac-like GTP-binding protein RAC13 (A)	GO:0005737,cytoplasm; GO:0016020,membrane; GO:0005525,GTP binding; GO:0003924,GTPase activity; GO:0007264,small GTPase mediated signal transduction	AP2 domain
Lsi06G016650	NAC	TF	NAC	61	132	1.11	up	chr06	+	K03679 exosome complex component RRP4 | (RefSeq) exosome complex component RRP4 homolog (A)	GO:0005737,cytoplasm; GO:0000177,cytoplasmic exosome (RNase complex); GO:0000176,nuclear exosome (RNase complex); GO:0005730,nucleolus; GO:0005654,nucleoplasm; GO:0003723,RNA binding; GO:0071034,CUT catabolic process; GO:0043928,exonucleolytic nuclear-transcribed mRNA catabolic process involved in deadenylation-dependent decay; GO:0000467,exonucleolytic trimming to generate mature 3'-end of 5.8S …	Sld3 N-terminal domain
Lsi02G007690	SBP	TF	SBP	48	103	1.102	up	chr02	+	K13415 protein brassinosteroid insensitive 1 [EC:2.7.10.1 2.7.11.1] | (RefSeq) uncharacterized protein LOC103413440 isoform X1 (A)	GO:0005737,cytoplasm; GO:0005634,nucleus; GO:0003677,DNA binding; GO:0003700,DNA-binding transcription factor activity; GO:0046872,metal ion binding; GO:0030154,cell differentiation; GO:0009908,flower development; GO:0010229,inflorescence development; GO:0009911,positive regulation of flower development; GO:0010321,regulation of vegetative phase change; GO:0006351,transcription, DNA-templated; GO…	SBP domain
Lsi08G013900	zf-HD	TF	zf-HD	85	180	1.088	up	chr08	-	K15777 4,5-DOPA dioxygenase extradiol [EC:1.13.11.-] | (RefSeq) uncharacterized protein LOC110630336 (A)	GO:0005634,nucleus; GO:0003677,DNA binding; GO:0046872,metal ion binding; GO:0042803,protein homodimerization activity; GO:0006355,regulation of transcription, DNA-templated; GO:0006351,transcription, DNA-templated	ZF-HD protein dimerisation region
Lsi04G009510	Others	TR	Others	238	502	1.074	up	chr04	-	K04802 proliferating cell nuclear antigen | (RefSeq) proliferating cell nuclear antigen-like (A)	GO:0005634,nucleus; GO:0003677,DNA binding; GO:0030337,DNA polymerase processivity factor activity; GO:0006260,DNA replication; GO:0006275,regulation of DNA replication	Rad9
Lsi04G023530	AP2/ERF-ERF	TF	AP2/ERF->AP2/ERF-ERF	1146	2402	1.068	up	chr04	+	K09286 EREBP-like factor | (RefSeq) ethylene-responsive transcription factor RAP2-13-like (A)	GO:0005634,nucleus; GO:0003677,DNA binding; GO:0003700,DNA-binding transcription factor activity; GO:0043565,sequence-specific DNA binding; GO:0071472,cellular response to salt stress; GO:0009736,cytokinin-activated signaling pathway; GO:0009873,ethylene-activated signaling pathway; GO:0045595,regulation of cell differentiation; GO:0009409,response to cold; GO:0009416,response to light stimulus; …	AP2 domain
Lsi03G001100	C2H2	TF	C2H2	160	334	1.058	up	chr03	-	K23196 zinc finger and BTB domain-containing protein 18 | (RefSeq) zinc finger protein WIP5-like (A)	GO:0005634,nucleus; GO:0003700,DNA-binding transcription factor activity; GO:0046872,metal ion binding; GO:0003676,nucleic acid binding; GO:0006355,regulation of transcription, DNA-templated; GO:0006351,transcription, DNA-templated	--
Lsi02G002570	C2H2	TF	C2H2	139	289	1.054	up	chr02	-	K22410 PR domain zinc finger protein 16 | (RefSeq) protein indeterminate-domain 2-like (A)	GO:0005634,nucleus; GO:0003700,DNA-binding transcription factor activity; GO:0046872,metal ion binding; GO:0046982,protein heterodimerization activity; GO:0043621,protein self-association; GO:0044212,transcription regulatory region DNA binding; GO:0048444,floral organ morphogenesis; GO:0009630,gravitropism; GO:0009965,leaf morphogenesis; GO:0010601,positive regulation of auxin biosynthetic proces…	Sec23/Sec24 zinc finger
Lsi01G002370	GARP-G2-like	TF	GARP->GARP-G2-like	121	249	1.036	up	chr01	+	K08026 one cut domain, family member 1, hepatocyte nuclear factor 6 | (RefSeq) probable transcription factor KAN2 (A)	GO:0005634,nucleus; GO:0003677,DNA binding; GO:0003700,DNA-binding transcription factor activity; GO:0006355,regulation of transcription, DNA-templated; GO:0006351,transcription, DNA-templated	Myb-like DNA-binding domain
Lsi01G003030	SBP	TF	SBP	218	446	1.034	up	chr01	-	K13415 protein brassinosteroid insensitive 1 [EC:2.7.10.1 2.7.11.1] | (RefSeq) uncharacterized protein LOC103413440 isoform X1 (A)	GO:0005737,cytoplasm; GO:0005634,nucleus; GO:0003677,DNA binding; GO:0046872,metal ion binding; GO:0048653,anther development; GO:0030154,cell differentiation; GO:0009554,megasporogenesis; GO:0009556,microsporogenesis; GO:0006355,regulation of transcription, DNA-templated; GO:0006351,transcription, DNA-templated	SBP domain
Lsi02G008330	HSF	TF	HSF	1258	2561	1.026	up	chr02	-	K09419 heat shock transcription factor, other eukaryote | (RefSeq) heat stress transcription factor A-4c-like (A)	GO:0005737,cytoplasm; GO:0005634,nucleus; GO:0003700,DNA-binding transcription factor activity; GO:0042803,protein homodimerization activity; GO:0043565,sequence-specific DNA binding; GO:0045893,positive regulation of transcription, DNA-templated; GO:0006355,regulation of transcription, DNA-templated; GO:0010200,response to chitin; GO:0000302,response to reactive oxygen species; GO:0006351,transc…	HSF-type DNA-binding
Lsi05G014070	MYB	TF	MYB->MYB	68	138	1.022	up	chr05	+	K09422 transcription factor MYB, plant | (RefSeq) transcription factor MYB108 (A)	GO:0005634,nucleus; GO:0003700,DNA-binding transcription factor activity; GO:0043565,sequence-specific DNA binding; GO:0009737,response to abscisic acid; GO:1902074,response to salt; GO:0009651,response to salt stress; GO:0006351,transcription, DNA-templated	Myb-like DNA-binding domain
Lsi08G013480	DBB	TF	DBB	126	256	1.019	up	chr08	+	K12135 zinc finger protein CONSTANS | (RefSeq) zinc finger protein CONSTANS-like (A)	GO:0005634,nucleus; GO:0003700,DNA-binding transcription factor activity; GO:0043565,sequence-specific DNA binding; GO:0000989,NA; GO:0008270,zinc ion binding; GO:0009640,photomorphogenesis; GO:0006355,regulation of transcription, DNA-templated; GO:0009641,shade avoidance; GO:0006351,transcription, DNA-templated	Predicted membrane protein (DUF2318)
Lsi05G016630	AUX/IAA	TR	AUX/IAA	1900	3839	1.015	up	chr05	+	K14484 auxin-responsive protein IAA | (RefSeq) auxin-responsive protein IAA14 (A)	GO:0005634,nucleus; GO:0003700,DNA-binding transcription factor activity; GO:0009734,auxin-activated signaling pathway; GO:0010102,lateral root morphogenesis; GO:0045892,negative regulation of transcription, DNA-templated; GO:0009733,response to auxin; GO:0006351,transcription, DNA-templated	AUX/IAA family
Lsi07G014820	SBP	TF	SBP	1183	2385	1.011	up	chr07	-	K13415 protein brassinosteroid insensitive 1 [EC:2.7.10.1 2.7.11.1] | (RefSeq) uncharacterized protein LOC103413440 isoform X1 (A)	GO:0005634,nucleus; GO:0003677,DNA binding; GO:0046872,metal ion binding; GO:0048653,anther development; GO:0006355,regulation of transcription, DNA-templated; GO:0006351,transcription, DNA-templated	--
Lsi05G016640	AUX/IAA	TR	AUX/IAA	926	1863	1.009	up	chr05	+	K14484 auxin-responsive protein IAA | (RefSeq) auxin-responsive protein IAA14-like isoform X1 (A)	GO:0005634,nucleus; GO:0003700,DNA-binding transcription factor activity; GO:0009734,auxin-activated signaling pathway; GO:0009630,gravitropism; GO:0009733,response to auxin; GO:0009753,response to jasmonic acid; GO:0009414,response to water deprivation; GO:0009611,response to wounding; GO:0006351,transcription, DNA-templated	AUX/IAA family
Lsi06G016560	MYB-related	TF	MYB->MYB-related	2831	1415	-1.001	down	chr06	-	K11649 SWI/SNF related-matrix-associated actin-dependent regulator of chromatin subfamily C | (RefSeq) SWI/SNF complex subunit SWI3A (A)	GO:0016514,SWI/SNF complex; GO:0003677,DNA binding; GO:0006338,chromatin remodeling; GO:0016569,covalent chromatin modification; GO:0007275,multicellular organism development; GO:0006355,regulation of transcription, DNA-templated; GO:0006351,transcription, DNA-templated	SWIRM domain
Lsi06G011090	Others	TR	Others	6900	3398	-1.022	down	chr06	-	K12135 zinc finger protein CONSTANS | (RefSeq) hypothetical protein (A)	GO:0005634,nucleus; GO:0003700,DNA-binding transcription factor activity; GO:0008270,zinc ion binding; GO:0048571,long-day photoperiodism; GO:0048579,negative regulation of long-day photoperiodism, flowering; GO:0045892,negative regulation of transcription, DNA-templated; GO:0048576,positive regulation of short-day photoperiodism, flowering; GO:0009909,regulation of flower development; GO:0006355…	B-box zinc finger
Lsi08G006010	NAC	TF	NAC	6345	3101	-1.033	down	chr08	+	K00521 ferric-chelate reductase [EC:1.16.1.7] | (RefSeq) ferric reduction oxidase 7, chloroplastic-like (A)	GO:0016021,integral component of membrane; GO:0005634,nucleus; GO:0003677,DNA binding; GO:0003700,DNA-binding transcription factor activity; GO:1900057,positive regulation of leaf senescence; GO:0045893,positive regulation of transcription, DNA-templated; GO:0010200,response to chitin; GO:0006351,transcription, DNA-templated	PPR repeat
Lsi04G014290	C2C2-GATA	TF	C2C2->C2C2-GATA	1738	834	-1.06	down	chr04	+	K21630 GATA-type zinc finger protein 1 | (RefSeq) GATA transcription factor 19-like (A)	GO:0005634,nucleus; GO:0005667,transcription factor complex; GO:0003682,chromatin binding; GO:0003700,DNA-binding transcription factor activity; GO:0000977,RNA polymerase II regulatory region sequence-specific DNA binding; GO:0001085,RNA polymerase II transcription factor binding; GO:0044212,transcription regulatory region DNA binding; GO:0001228,DNA-binding transcription activator activity, RNA …	GATA zinc finger
Lsi07G005770	C2H2	TF	C2H2	1227	581	-1.08	down	chr07	-	K23317 metal regulatory transcription factor 1 | (RefSeq) zinc finger protein JACKDAW-like (A)	GO:0003677,DNA binding; GO:0003700,DNA-binding transcription factor activity; GO:0046872,metal ion binding; GO:0006355,regulation of transcription, DNA-templated; GO:0006351,transcription, DNA-templated	C2H2-type zinc finger
Lsi01G009090	LOB	TF	LOB	526	248	-1.084	down	chr01	+	K21994 LOB domain-containing protein 18 | (RefSeq) LOB domain-containing protein 19-like (A)	GO:0006807,nitrogen compound metabolic process; GO:0060776,simple leaf morphogenesis	Lateral organ boundaries (LOB) domain
Lsi02G012150	WRKY	TF	WRKY	14318	6714	-1.093	down	chr02	-	K13424 WRKY transcription factor 33 | (RefSeq) probable WRKY transcription factor 33 (A)	GO:0005634,nucleus; GO:0003700,DNA-binding transcription factor activity; GO:0043565,sequence-specific DNA binding; GO:0009738,abscisic acid-activated signaling pathway; GO:0009740,gibberellic acid mediated signaling pathway; GO:0009788,negative regulation of abscisic acid-activated signaling pathway; GO:0009938,negative regulation of gibberellic acid mediated signaling pathway; GO:0045893,positi…	WRKY DNA -binding domain
Lsi03G022550	WRKY	TF	WRKY	3901	1792	-1.123	down	chr03	+	K13424 WRKY transcription factor 33 | (RefSeq) probable WRKY transcription factor 26 (A)	GO:0005634,nucleus; GO:0003700,DNA-binding transcription factor activity; GO:0043565,sequence-specific DNA binding; GO:0044212,transcription regulatory region DNA binding; GO:0010120,camalexin biosynthetic process; GO:0070370,cellular heat acclimation; GO:0034605,cellular response to heat; GO:0042742,defense response to bacterium; GO:0050832,defense response to fungus; GO:0010508,positive regulat…	WRKY DNA -binding domain
Lsi04G004440	MYB	TF	MYB->MYB	1755	800	-1.132	down	chr04	+	K09422 transcription factor MYB, plant | (RefSeq) myb-like protein Q (A)	GO:0005634,nucleus; GO:0003700,DNA-binding transcription factor activity; GO:0000981,DNA-binding transcription factor activity, RNA polymerase II-specific; GO:0043565,sequence-specific DNA binding; GO:0001135,RNA polymerase II transcription regulator recruiting activity; GO:0044212,transcription regulatory region DNA binding; GO:0009926,auxin polar transport; GO:0009734,auxin-activated signaling …	Myb DNA-binding like
Lsi01G006440	bZIP	TF	bZIP	549	249	-1.143	down	chr01	-	--	GO:0005634,nucleus; GO:0003700,DNA-binding transcription factor activity; GO:0046982,protein heterodimerization activity; GO:0043565,sequence-specific DNA binding; GO:0044212,transcription regulatory region DNA binding; GO:0009845,seed germination; GO:0006351,transcription, DNA-templated	Clc-like
Lsi02G013900	MYB-related	TF	MYB->MYB-related	719	321	-1.164	down	chr02	-	K09422 transcription factor MYB, plant | (RefSeq) transcription factor MYB59-like (A)	GO:0005634,nucleus; GO:0003700,DNA-binding transcription factor activity; GO:0000981,DNA-binding transcription factor activity, RNA polymerase II-specific; GO:0043565,sequence-specific DNA binding; GO:0001135,RNA polymerase II transcription regulator recruiting activity; GO:0044212,transcription regulatory region DNA binding; GO:0030154,cell differentiation; GO:0006357,regulation of transcription…	Myb-like DNA-binding domain
Lsi07G009830	C2C2-CO-like	TF	C2C2->C2C2-CO-like	11221	4932	-1.186	down	chr07	-	K12135 zinc finger protein CONSTANS | (RefSeq) zinc finger protein CONSTANS-LIKE 2-like (A)	GO:0005634,nucleus; GO:0003677,DNA binding; GO:0003700,DNA-binding transcription factor activity; GO:0042802,identical protein binding; GO:0008270,zinc ion binding; GO:0009909,regulation of flower development; GO:0009416,response to light stimulus; GO:0006351,transcription, DNA-templated	CCT motif
Lsi03G014770	MYB	TF	MYB->MYB	3777	1660	-1.187	down	chr03	+	K09422 transcription factor MYB, plant | (RefSeq) myb-related protein 306-like (A)	GO:0005634,nucleus; GO:0003677,DNA binding; GO:0006355,regulation of transcription, DNA-templated; GO:0006351,transcription, DNA-templated	Myb-like DNA-binding domain
Lsi02G029020	GRAS	TF	GRAS	238	104	-1.192	down	chr02	-	K14494 DELLA protein | (RefSeq) DELLA protein RGL2-like (A)	GO:0005634,nucleus; GO:0042446,hormone biosynthetic process; GO:0009877,nodulation; GO:2000032,regulation of secondary shoot formation; GO:0006355,regulation of transcription, DNA-templated; GO:0006351,transcription, DNA-templated	GRAS domain family
Lsi01G007540	AP2/ERF-ERF	TF	AP2/ERF->AP2/ERF-ERF	3581	1566	-1.193	down	chr01	+	K09286 EREBP-like factor | (RefSeq) ethylene-responsive transcription factor ERF056 (A)	GO:0005634,nucleus; GO:0003677,DNA binding; GO:0003700,DNA-binding transcription factor activity; GO:0009873,ethylene-activated signaling pathway; GO:0006351,transcription, DNA-templated	AP2 domain
Lsi10G000740	GARP-G2-like	TF	GARP->GARP-G2-like	7768	3395	-1.194	down	chr10	-	K14491 two-component response regulator ARR-B family | (RefSeq) hypothetical protein (A)	GO:0005634,nucleus; GO:0003677,DNA binding; GO:0006355,regulation of transcription, DNA-templated; GO:0006351,transcription, DNA-templated	--
Lsi11G004010	bHLH	TF	bHLH	831	356	-1.222	down	chr11	+	K16189 phytochrome-interacting factor 4 | (RefSeq) transcription factor PIF4 (A)	GO:0005634,nucleus; GO:0001046,core promoter sequence-specific DNA binding; GO:0003700,DNA-binding transcription factor activity; GO:0046983,protein dimerization activity; GO:0001228,DNA-binding transcription activator activity, RNA polymerase II-specific; GO:0055046,microgametogenesis; GO:0048235,pollen sperm cell differentiation; GO:0006355,regulation of transcription, DNA-templated; GO:0080147…	Helix-loop-helix DNA-binding domain
Lsi06G002740	C2C2-GATA	TF	C2C2->C2C2-GATA	1029	440	-1.226	down	chr06	-	--	GO:0005634,nucleus; GO:0005667,transcription factor complex; GO:0003682,chromatin binding; GO:0003700,DNA-binding transcription factor activity; GO:0000977,RNA polymerase II regulatory region sequence-specific DNA binding; GO:0001085,RNA polymerase II transcription factor binding; GO:0044212,transcription regulatory region DNA binding; GO:0001228,DNA-binding transcription activator activity, RNA …	GATA zinc finger
Lsi03G002910	AP2/ERF-ERF	TF	AP2/ERF->AP2/ERF-ERF	1653	690	-1.259	down	chr03	+	K09286 EREBP-like factor | (RefSeq) dehydration-responsive element-binding protein 2C (A)	GO:0005634,nucleus; GO:0003700,DNA-binding transcription factor activity; GO:0043565,sequence-specific DNA binding; GO:0044212,transcription regulatory region DNA binding; GO:0009738,abscisic acid-activated signaling pathway; GO:0010286,heat acclimation; GO:0045893,positive regulation of transcription, DNA-templated; GO:0009737,response to abscisic acid; GO:0006351,transcription, DNA-templated	AP2 domain
Lsi02G000490	TAZ	TR	TAZ	2312	937	-1.302	down	chr02	-	K10523 speckle-type POZ protein | (RefSeq) BTB/POZ and TAZ domain-containing protein 1-like (A)	GO:0005737,cytoplasm; GO:0005634,nucleus; GO:0019005,SCF ubiquitin ligase complex; GO:0005516,calmodulin binding; GO:0004402,histone acetyltransferase activity; GO:0003712,transcription coregulator activity; GO:0031625,ubiquitin protein ligase binding; GO:0008270,zinc ion binding; GO:0009553,embryo sac development; GO:0009555,pollen development; GO:0043161,proteasome-mediated ubiquitin-dependent …	TAZ zinc finger
Lsi10G010870	SRS	TF	SRS	1045	417	-1.325	down	chr10	+	--	GO:0005634,nucleus; GO:0003677,DNA binding; GO:0046872,metal ion binding; GO:0042803,protein homodimerization activity; GO:0009851,auxin biosynthetic process; GO:0009734,auxin-activated signaling pathway; GO:0009733,response to auxin; GO:0048364,root development	Domain of unknown function (DUF702)
Lsi11G003680	Others	TR	Others	548	219	-1.325	down	chr11	-	K14491 two-component response regulator ARR-B family | (RefSeq) two-component response regulator ARR12-like (A)	GO:0005634,nucleus; GO:0003677,DNA binding; GO:0003700,DNA-binding transcription factor activity; GO:0009736,cytokinin-activated signaling pathway; GO:0000160,phosphorelay signal transduction system; GO:0006351,transcription, DNA-templated	--
Lsi09G001780	AP2/ERF-ERF	TF	AP2/ERF->AP2/ERF-ERF	1464	567	-1.368	down	chr09	+	K09286 EREBP-like factor | (RefSeq) ethylene-responsive transcription factor RAP2-4 (A)	GO:0005634,nucleus; GO:0003677,DNA binding; GO:0003700,DNA-binding transcription factor activity; GO:0009873,ethylene-activated signaling pathway; GO:0010200,response to chitin; GO:0006351,transcription, DNA-templated	AP2 domain
Lsi04G016070	GARP-G2-like	TF	GARP->GARP-G2-like	916	350	-1.386	down	chr04	+	K08026 one cut domain, family member 1, hepatocyte nuclear factor 6 | (RefSeq) probable transcription factor KAN2 (A)	GO:0005618,cell wall; GO:0005634,nucleus; GO:0003700,DNA-binding transcription factor activity; GO:0044212,transcription regulatory region DNA binding; GO:0030154,cell differentiation; GO:0080060,integument development; GO:0048481,plant ovule development; GO:0006355,regulation of transcription, DNA-templated; GO:0006351,transcription, DNA-templated	Myb-like DNA-binding domain
Lsi11G000370	C2H2	TF	C2H2	3008	1112	-1.435	down	chr11	+	K22410 PR domain zinc finger protein 16 | (RefSeq) protein indeterminate-domain 2-like (A)	GO:0009507,chloroplast; GO:0003677,DNA binding; GO:0003700,DNA-binding transcription factor activity; GO:0046872,metal ion binding; GO:0006355,regulation of transcription, DNA-templated; GO:0006351,transcription, DNA-templated	Zinc-finger of C2H2 type
Lsi01G004880	GRAS	TF	GRAS	6797	2474	-1.458	down	chr01	-	K14777 ATP-dependent RNA helicase DDX47/RRP3 [EC:3.6.4.13] | (Kazusa) Lj5g3v1988830.1; - (A)	GO:0005737,cytoplasm; GO:0005634,nucleus; GO:0003700,DNA-binding transcription factor activity; GO:0043565,sequence-specific DNA binding; GO:0006351,transcription, DNA-templated	GRAS domain family
Lsi02G013460	GRAS	TF	GRAS	17823	6362	-1.486	down	chr02	-	K14494 DELLA protein | (RefSeq) DELLA protein GAI-like (A)	GO:0005829,cytosol; GO:0005634,nucleus; GO:0003700,DNA-binding transcription factor activity; GO:0043565,sequence-specific DNA binding; GO:0045893,positive regulation of transcription, DNA-templated; GO:0006355,regulation of transcription, DNA-templated; GO:0009410,response to xenobiotic stimulus; GO:0006351,transcription, DNA-templated	GRAS domain family
Lsi04G013000	NAC	TF	NAC	1145	391	-1.549	down	chr04	+	K00521 ferric-chelate reductase [EC:1.16.1.7] | (RefSeq) ferric reduction oxidase 7, chloroplastic-like (A)	GO:0005634,nucleus; GO:0003700,DNA-binding transcription factor activity; GO:0044212,transcription regulatory region DNA binding; GO:0080060,integument development; GO:0045995,regulation of embryonic development; GO:0009753,response to jasmonic acid; GO:0048317,seed morphogenesis; GO:0006351,transcription, DNA-templated	No apical meristem (NAM) protein
Lsi02G006990	MYB-related	TF	MYB->MYB-related	476	160	-1.572	down	chr02	-	K09422 transcription factor MYB, plant | (RefSeq) protein ODORANT1-like (A)	GO:0005634,nucleus; GO:0003700,DNA-binding transcription factor activity; GO:0000981,DNA-binding transcription factor activity, RNA polymerase II-specific; GO:0043565,sequence-specific DNA binding; GO:0001135,RNA polymerase II transcription regulator recruiting activity; GO:0044212,transcription regulatory region DNA binding; GO:0030154,cell differentiation; GO:0006357,regulation of transcription…	Myb-like DNA-binding domain
Lsi04G015170	MYB	TF	MYB->MYB	540	182	-1.574	down	chr04	-	K09422 transcription factor MYB, plant | (RefSeq) transcription factor MYB44-like (A)	GO:0005634,nucleus; GO:0003700,DNA-binding transcription factor activity; GO:0000981,DNA-binding transcription factor activity, RNA polymerase II-specific; GO:0043565,sequence-specific DNA binding; GO:0001135,RNA polymerase II transcription regulator recruiting activity; GO:0044212,transcription regulatory region DNA binding; GO:0009738,abscisic acid-activated signaling pathway; GO:0030154,cell d…	Myb DNA-binding like
Lsi10G013480	C2H2	TF	C2H2	1311	439	-1.58	down	chr10	+	K23480 zinc finger protein 362/384 | (RefSeq) zinc finger protein ZAT5 (A)	GO:0005634,nucleus; GO:0003700,DNA-binding transcription factor activity; GO:0046872,metal ion binding; GO:0043565,sequence-specific DNA binding; GO:0009631,cold acclimation; GO:0042538,hyperosmotic salinity response; GO:0009643,photosynthetic acclimation; GO:0010200,response to chitin; GO:0009409,response to cold; GO:0009408,response to heat; GO:0009416,response to light stimulus; GO:0006979,res…	Zinc-finger double-stranded RNA-binding
Lsi08G015190	C2H2	TF	C2H2	3996	1321	-1.597	down	chr08	-	K22534 PR domain zinc finger protein 5 | (RefSeq) zinc finger protein ZAT4-like (A)	GO:0005634,nucleus; GO:0003700,DNA-binding transcription factor activity; GO:0046872,metal ion binding; GO:0043565,sequence-specific DNA binding; GO:0035264,multicellular organism growth; GO:0045892,negative regulation of transcription, DNA-templated; GO:0010117,photoprotection; GO:0015979,photosynthesis; GO:0009737,response to abscisic acid; GO:0010200,response to chitin; GO:0009409,response to …	Autophagy receptor zinc finger-C2H2 domain
Lsi06G003590	AP2/ERF-ERF	TF	AP2/ERF->AP2/ERF-ERF	1120	338	-1.728	down	chr06	-	K09286 EREBP-like factor | (RefSeq) ethylene-responsive transcription factor RAP2-1 (A)	GO:0005634,nucleus; GO:0003677,DNA binding; GO:0003700,DNA-binding transcription factor activity; GO:0009873,ethylene-activated signaling pathway; GO:0006351,transcription, DNA-templated	AP2 domain
Lsi10G013890	GRAS	TF	GRAS	2522	727	-1.796	down	chr10	+	K14494 DELLA protein | (RefSeq) DELLA protein RGL1-like (A)	GO:0005829,cytosol; GO:0005634,nucleus; GO:0003700,DNA-binding transcription factor activity; GO:0043565,sequence-specific DNA binding; GO:0045893,positive regulation of transcription, DNA-templated; GO:0006355,regulation of transcription, DNA-templated; GO:0009410,response to xenobiotic stimulus; GO:0006351,transcription, DNA-templated	GRAS domain family
Lsi09G004710	AUX/IAA	TR	AUX/IAA	397	113	-1.817	down	chr09	-	K14484 auxin-responsive protein IAA | (RefSeq) auxin-induced protein 22D-like (A)	GO:0005634,nucleus; GO:0009734,auxin-activated signaling pathway; GO:0006355,regulation of transcription, DNA-templated; GO:0006351,transcription, DNA-templated	--
Lsi10G013470	MYB-related	TF	MYB->MYB-related	2119	570	-1.893	down	chr10	-	K09422 transcription factor MYB, plant | (RefSeq) transcription factor MYB48-like (A)	GO:0005634,nucleus; GO:0000981,DNA-binding transcription factor activity, RNA polymerase II-specific; GO:0043565,sequence-specific DNA binding; GO:0001135,RNA polymerase II transcription regulator recruiting activity; GO:0044212,transcription regulatory region DNA binding; GO:0030154,cell differentiation; GO:0006357,regulation of transcription by RNA polymerase II; GO:0006351,transcription, DNA-t…	Myb-like DNA-binding domain
Lsi04G020490	AP2/ERF-ERF	TF	AP2/ERF->AP2/ERF-ERF	4308	1109	-1.958	down	chr04	+	K09286 EREBP-like factor | (RefSeq) ethylene-responsive transcription factor 4 (A)	GO:0016604,nuclear body; GO:0005634,nucleus; GO:0003700,DNA-binding transcription factor activity; GO:0043565,sequence-specific DNA binding; GO:0009873,ethylene-activated signaling pathway; GO:0009864,induced systemic resistance, jasmonic acid mediated signaling pathway; GO:0010105,negative regulation of ethylene-activated signaling pathway; GO:0045892,negative regulation of transcription, DNA-te…	AP2 domain
Lsi06G002660	MYB-related	TF	MYB->MYB-related	484	121	-1.996	down	chr06	+	K08869 aarF domain-containing kinase | (RefSeq) predicted protein (A)	GO:0005634,nucleus; GO:0003677,DNA binding; GO:0003700,DNA-binding transcription factor activity; GO:0046872,metal ion binding; GO:0045892,negative regulation of transcription, DNA-templated; GO:0009723,response to ethylene; GO:0009739,response to gibberellin; GO:0009744,response to sucrose; GO:0006351,transcription, DNA-templated	Myb-like DNA-binding domain
Lsi08G015000	MYB	TF	MYB->MYB	5839	1125	-2.376	down	chr08	+	K09422 transcription factor MYB, plant | (RefSeq) transcription factor MYB44-like (A)	GO:0005634,nucleus; GO:0003700,DNA-binding transcription factor activity; GO:0000981,DNA-binding transcription factor activity, RNA polymerase II-specific; GO:0043565,sequence-specific DNA binding; GO:0001135,RNA polymerase II transcription regulator recruiting activity; GO:0044212,transcription regulatory region DNA binding; GO:0030154,cell differentiation; GO:0019760,glucosinolate metabolic pro…	Myb DNA-binding like
Lsi04G009840	C3H	TF	C3H	77789	14897	-2.385	down	chr04	+	K23048 RING finger protein unkempt | (RefSeq) zinc finger CCCH domain-containing protein 29-like (A)	GO:0005634,nucleus; GO:0003677,DNA binding; GO:0003700,DNA-binding transcription factor activity; GO:0046872,metal ion binding; GO:0050832,defense response to fungus; GO:0006355,regulation of transcription, DNA-templated; GO:0010200,response to chitin; GO:0009409,response to cold	Torus domain
Lsi04G023820	AP2/ERF-ERF	TF	AP2/ERF->AP2/ERF-ERF	192	36	-2.412	down	chr04	-	K09286 EREBP-like factor | (RefSeq) hypothetical protein (A)	GO:0005634,nucleus; GO:0003700,DNA-binding transcription factor activity; GO:0043565,sequence-specific DNA binding; GO:0044212,transcription regulatory region DNA binding; GO:0071497,cellular response to freezing; GO:0034605,cellular response to heat; GO:0009873,ethylene-activated signaling pathway; GO:0045893,positive regulation of transcription, DNA-templated; GO:0009753,response to jasmonic ac…	AP2 domain
Lsi05G021100	WRKY	TF	WRKY	24851	4328	-2.522	down	chr05	-	K16225 probable WRKY transcription factor 52 | (RefSeq) disease resistance protein RRS1-like (A)	GO:0009507,chloroplast; GO:0005634,nucleus; GO:0003677,DNA binding; GO:0003700,DNA-binding transcription factor activity; GO:0043565,sequence-specific DNA binding; GO:0009816,defense response to bacterium, incompatible interaction; GO:0010150,leaf senescence; GO:0045893,positive regulation of transcription, DNA-templated; GO:0031347,regulation of defense response; GO:0010200,response to chitin; G…	WRKY DNA -binding domain
Lsi09G004580	AP2/ERF-ERF	TF	AP2/ERF->AP2/ERF-ERF	1216	172	-2.821	down	chr09	+	K09286 EREBP-like factor | (RefSeq) ethylene-responsive transcription factor 1A-like (A)	GO:0005634,nucleus; GO:0003677,DNA binding; GO:0003700,DNA-binding transcription factor activity; GO:0051301,cell division; GO:0006952,defense response; GO:0009873,ethylene-activated signaling pathway; GO:0010087,phloem or xylem histogenesis; GO:0010200,response to chitin; GO:0006351,transcription, DNA-templated	AP2 domain
Lsi04G014930	C2H2	TF	C2H2	23244	3023	-2.943	down	chr04	+	K23480 zinc finger protein 362/384 | (RefSeq) zinc finger protein ZAT5 (A)	GO:0005634,nucleus; GO:0003700,DNA-binding transcription factor activity; GO:0046872,metal ion binding; GO:0043565,sequence-specific DNA binding; GO:0035264,multicellular organism growth; GO:0045892,negative regulation of transcription, DNA-templated; GO:0010117,photoprotection; GO:0015979,photosynthesis; GO:0009737,response to abscisic acid; GO:0010200,response to chitin; GO:0009409,response to …	C2H2-type zinc ribbon
Lsi09G004890	AP2/ERF-ERF	TF	AP2/ERF->AP2/ERF-ERF	18459	2299	-3.005	down	chr09	-	K09286 EREBP-like factor | (RefSeq) ethylene-responsive transcription factor ERF105 (A)	GO:0005634,nucleus; GO:0003677,DNA binding; GO:0003700,DNA-binding transcription factor activity; GO:0009873,ethylene-activated signaling pathway; GO:0010200,response to chitin; GO:0006351,transcription, DNA-templated	AP2 domain
Lsi07G012740	AP2/ERF-ERF	TF	AP2/ERF->AP2/ERF-ERF	11045	1358	-3.024	down	chr07	+	K09286 EREBP-like factor | (RefSeq) ethylene-responsive transcription factor 5 (A)	GO:0005634,nucleus; GO:0003700,DNA-binding transcription factor activity; GO:0043565,sequence-specific DNA binding; GO:0006952,defense response; GO:0009873,ethylene-activated signaling pathway; GO:0010200,response to chitin; GO:0009409,response to cold; GO:0006351,transcription, DNA-templated	AP2 domain
Lsi02G005120	MADS-MIKC	TF	MADS->MADS-MIKC	32	3	-3.639	down	chr02	+	K09264 MADS-box transcription factor, plant | (RefSeq) truncated transcription factor CAULIFLOWER D-like (A)	GO:0005634,nucleus; GO:0003677,DNA binding; GO:0003700,DNA-binding transcription factor activity; GO:0046983,protein dimerization activity; GO:0000977,RNA polymerase II regulatory region sequence-specific DNA binding; GO:0030154,cell differentiation; GO:0009553,embryo sac development; GO:0010582,floral meristem determinacy; GO:0048437,floral organ development; GO:0048449,floral organ formation; G…	Septum formation initiator
Lsi05G012660	AP2/ERF-ERF	TF	AP2/ERF->AP2/ERF-ERF	6065	486	-3.642	down	chr05	+	K09286 EREBP-like factor | (RefSeq) dehydration-responsive element-binding protein 1A (A)	GO:0005634,nucleus; GO:0003700,DNA-binding transcription factor activity; GO:0043565,sequence-specific DNA binding; GO:0009738,abscisic acid-activated signaling pathway; GO:0019760,glucosinolate metabolic process; GO:0006351,transcription, DNA-templated	AP2 domain
