# Supplementary figures and images for: Transcriptome and Metabolome Analyses Reveal That Jasmonic Acids May Facilitate the Infection of Cucumber Green Mottle Mosaic Virus in Bottle Gourd
Source: MDPI journal article supplement (doi:10.3390/ijms242316566), 2023-11-21

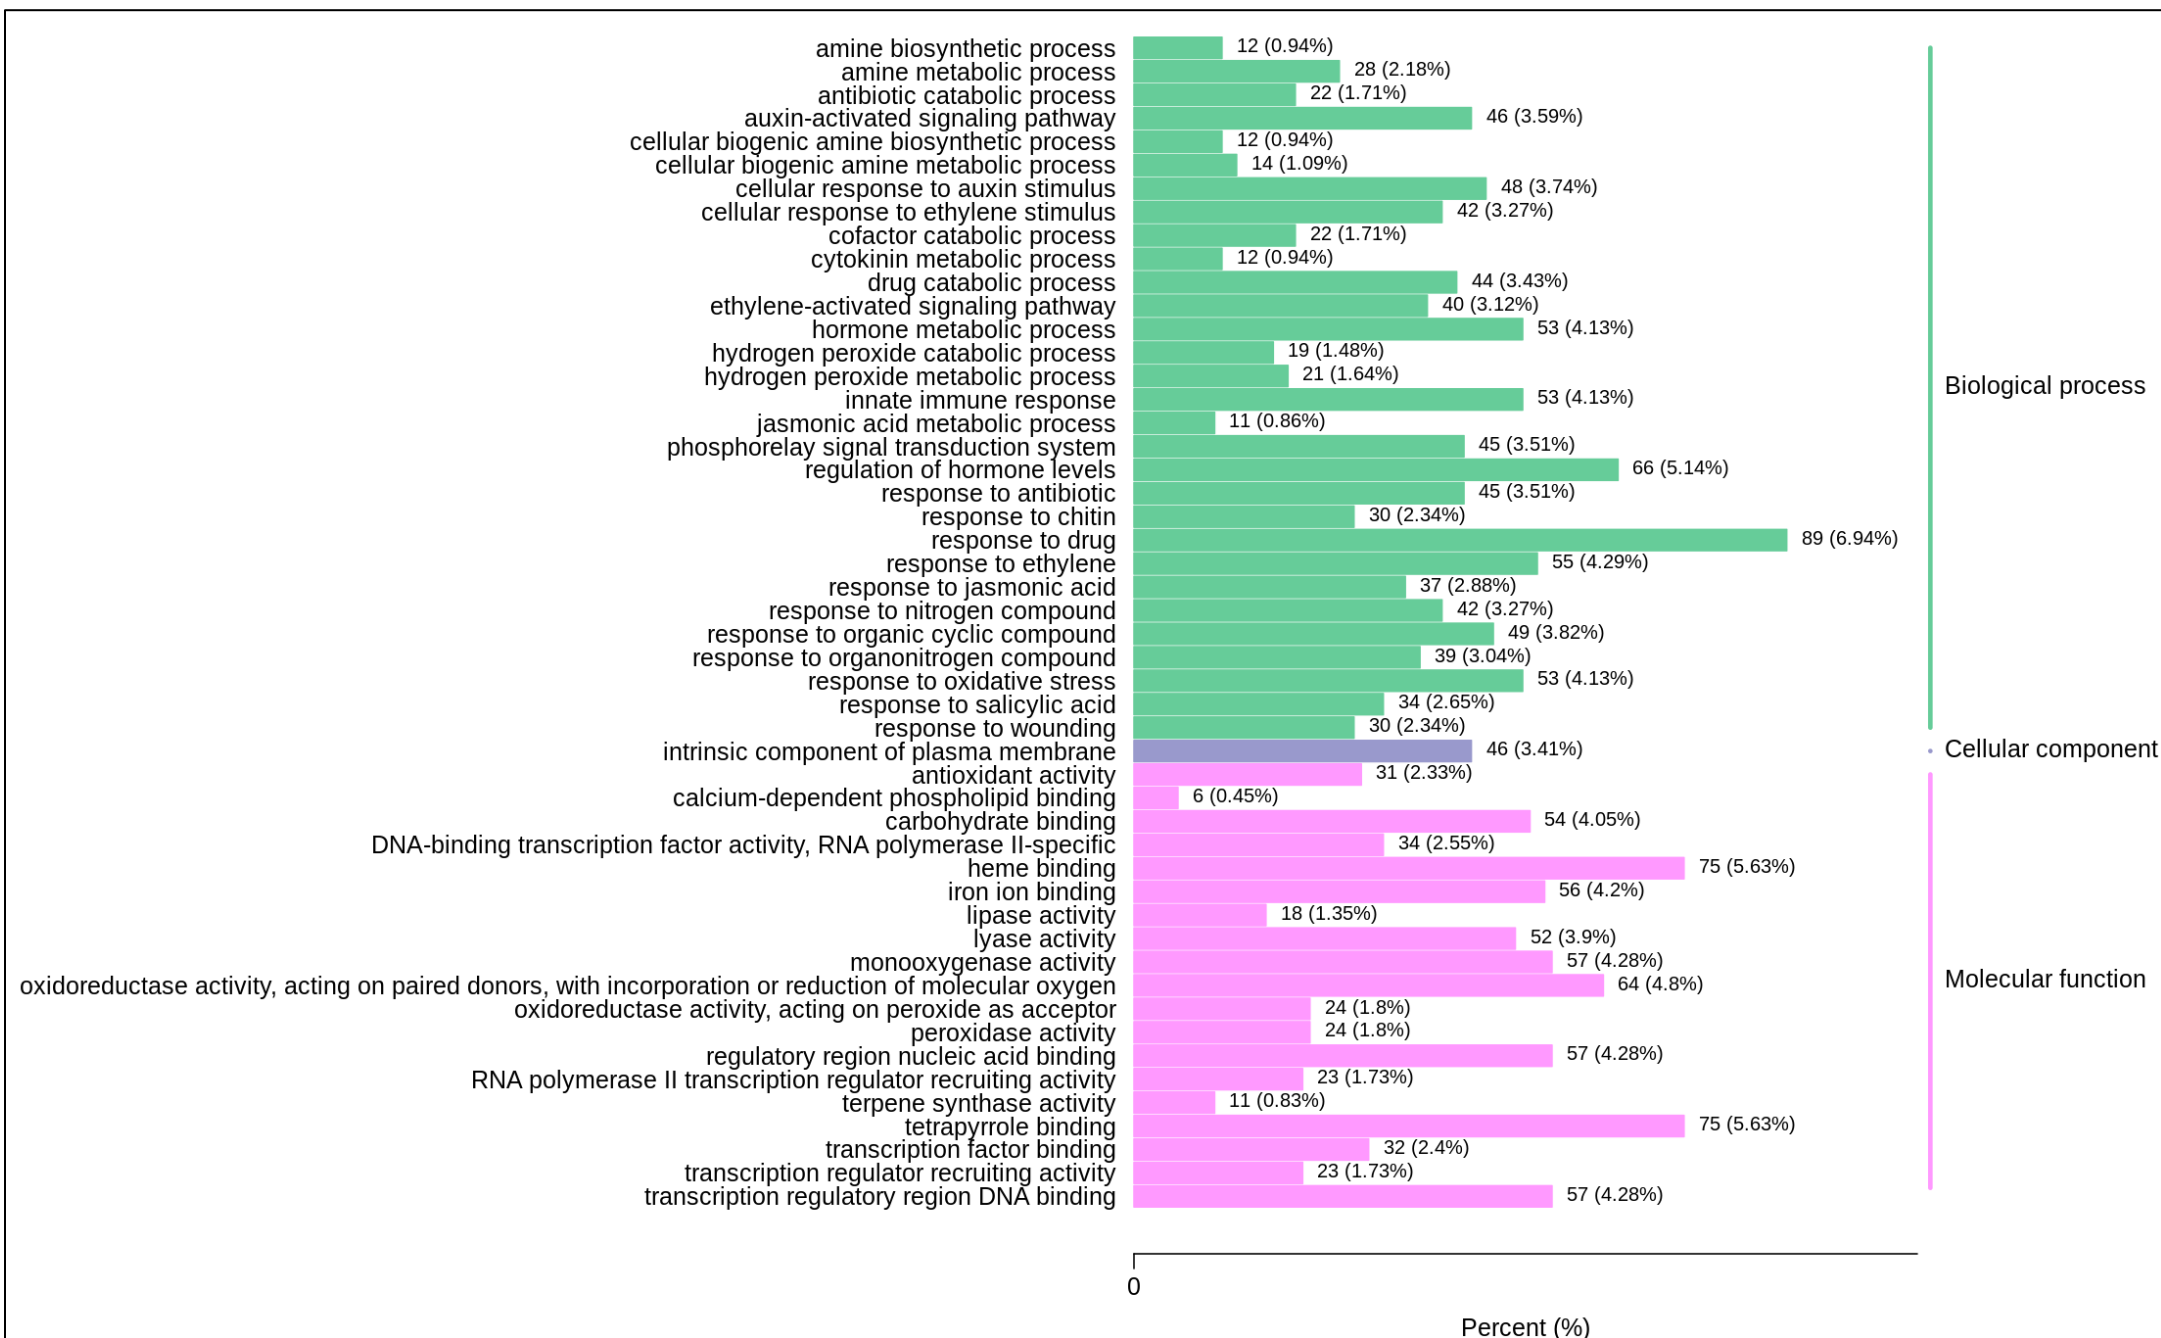

**Supplementary Figure 1 Go enrichment analysis of DEGs between ZLM12 and ZLV12**

Supplement: s1 [file s1]
